# Supplementary material for: Identifying transcriptomic correlates of histology using deep learning
Source: PubMed Central journal article supplement (PMC7688140; doi:10.1371/journal.pone.0242858), 2020-11-25

**S3 Fig. Reproducibility of gene-feature correlations between datasets.** Scatter plots of gene-feature correlations computed on the validation- and respectively test dataset. (A) scatter plot of correlations ( $R=0.9205$ ). (B) scatter plot of Fisher transformed correlations ( $R=0.9233$ )

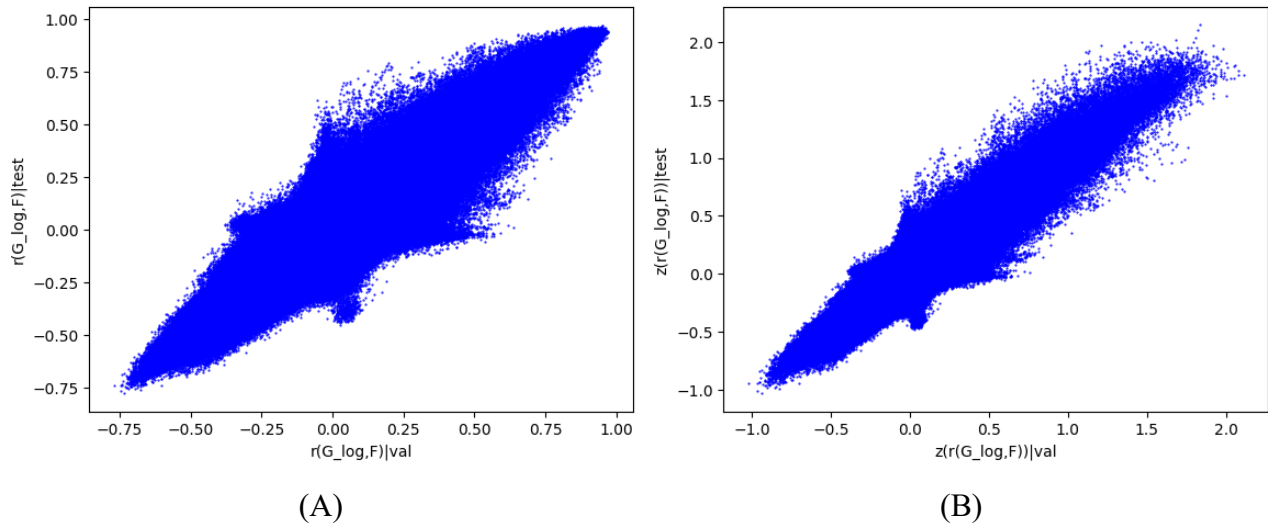

Supplement: pone.0242858.s003.pdf [file pone.0242858.s003.pdf]
