# Supplementary material for: Identifying transcriptomic correlates of histology using deep learning
Source: PubMed Central journal article supplement (PMC7688140; doi:10.1371/journal.pone.0242858), 2020-11-25
Supplement: pone.0242858.s004.pdf [file pone.0242858.s004.pdf]

**S1 Table. The numbers of slides and respectively tiles for each data set and tissue type.**

| Tissue                                | slides |            |      |       | tiles   |            |         |         |
|---------------------------------------|--------|------------|------|-------|---------|------------|---------|---------|
|                                       | train  | validation | test | total | train   | validation | test    | total   |
| Adipose - Subcutaneous                | 22     | 7          | 7    | 36    | 6,915   | 2,203      | 2,318   | 11,436  |
| Adipose - Visceral (Omentum)          | 12     | 5          | 4    | 21    | 3,374   | 1,668      | 1,008   | 6,050   |
| Adrenal Gland                         | 29     | 9          | 9    | 47    | 10,007  | 3,382      | 2,040   | 15,429  |
| Artery - Aorta                        | 25     | 8          | 9    | 42    | 7,346   | 2,203      | 2,646   | 12,195  |
| Artery - Coronary                     | 30     | 10         | 10   | 50    | 1,559   | 816        | 703     | 3,078   |
| Artery - Tibial                       | 27     | 9          | 9    | 45    | 1,581   | 687        | 529     | 2,797   |
| Bladder                               | 7      | 2          | 2    | 11    | 4,472   | 1,066      | 1,276   | 6,814   |
| Brain - Cerebellum                    | 29     | 10         | 10   | 49    | 7,449   | 2,848      | 1,958   | 12,255  |
| Brain - Cortex                        | 30     | 9          | 10   | 49    | 8,793   | 2,495      | 2,845   | 14,133  |
| Breast - Mammary Tissue               | 25     | 9          | 8    | 42    | 7,417   | 3,739      | 3,625   | 14,781  |
| Cervix - Ectocervix                   | 3      | 2          | 1    | 6     | 1,161   | 908        | 823     | 2,892   |
| Cervix - Endocervix                   | 3      | 1          | 1    | 5     | 1,375   | 221        | 597     | 2,193   |
| Colon - Sigmoid                       | 30     | 10         | 10   | 50    | 12,413  | 3,078      | 4,067   | 19,558  |
| Colon - Transverse                    | 28     | 9          | 10   | 47    | 9,754   | 3,698      | 3,159   | 16,611  |
| Esophagus - Gastroesophageal Junction | 28     | 10         | 10   | 48    | 13,195  | 5,032      | 5,800   | 24,027  |
| Esophagus - Mucosa                    | 28     | 10         | 10   | 48    | 6,225   | 2,086      | 1,937   | 10,248  |
| Esophagus - Muscularis                | 28     | 8          | 9    | 45    | 12,076  | 3,246      | 3,612   | 18,934  |
| Fallopian Tube                        | 4      | 1          | 2    | 7     | 638     | 214        | 170     | 1,022   |
| Heart - Atrial Appendage              | 30     | 10         | 10   | 50    | 10,691  | 3,833      | 4,337   | 18,861  |
| Heart - Left Ventricle                | 29     | 9          | 9    | 47    | 10,861  | 3,021      | 2,772   | 16,654  |
| Kidney - Cortex                       | 27     | 9          | 9    | 45    | 10,139  | 3,227      | 3,365   | 16,731  |
| Liver                                 | 30     | 10         | 10   | 50    | 13,229  | 4,111      | 4,197   | 21,537  |
| Lung                                  | 30     | 10         | 9    | 49    | 10,314  | 3,181      | 3,278   | 16,773  |
| Minor Salivary Gland                  | 30     | 10         | 10   | 50    | 4,426   | 1,527      | 1,878   | 7,831   |
| Muscle - Skeletal                     | 30     | 10         | 10   | 50    | 12,499  | 3,732      | 4,059   | 20,290  |
| Nerve - Tibial                        | 29     | 9          | 9    | 47    | 3,359   | 1,365      | 789     | 5,513   |
| Ovary                                 | 29     | 10         | 9    | 48    | 12,178  | 3,475      | 3,594   | 19,247  |
| Uterus                                | 29     | 10         | 10   | 49    | 12,229  | 4,281      | 4,025   | 20,535  |
| Vagina                                | 30     | 10         | 10   | 50    | 16,274  | 5,171      | 5,312   | 26,757  |
| Pancreas                              | 29     | 9          | 10   | 48    | 12,863  | 3,965      | 4,799   | 21,627  |
| Pituitary                             | 30     | 10         | 9    | 49    | 4,940   | 1,598      | 1,793   | 8,331   |
| Prostate                              | 29     | 9          | 10   | 48    | 13,939  | 3,718      | 4,792   | 22,449  |
| Skin - Not Sun Exposed                | 30     | 10         | 10   | 50    | 13,990  | 4,644      | 4,128   | 22,762  |
| Skin - Sun Exposed                    | 30     | 10         | 10   | 50    | 11,582  | 4,911      | 3,545   | 20,038  |
| Small Intestine - Terminal Ileum      | 29     | 10         | 10   | 49    | 10,455  | 3,158      | 3,375   | 16,988  |
| Spleen                                | 30     | 9          | 10   | 49    | 12,747  | 4,595      | 4,530   | 21,872  |
| Stomach                               | 30     | 10         | 9    | 49    | 16,753  | 4,689      | 3,799   | 25,241  |
| Testis                                | 30     | 8          | 10   | 48    | 9,556   | 2,891      | 3,627   | 16,074  |
| Thyroid                               | 28     | 9          | 10   | 47    | 10,566  | 3,440      | 4,918   | 18,924  |
| Total                                 | 1,006  | 330        | 334  | 1,670 | 349,340 | 114,123    | 116,025 | 579,488 |
