# Supplementary material for: Identifying transcriptomic correlates of histology using deep learning
Source: PubMed Central journal article supplement (PMC7688140; doi:10.1371/journal.pone.0242858), 2020-11-25
Supplement: pone.0242858.s005.pdf [file pone.0242858.s005.pdf]

**S2 Table. Genes correlated with visual histopathological features.** Genes are grouped w.r.t. tissues and ordered by correlation - for each gene we only show the best correlated feature, in the form [layer]\_[channel] (for the architecture VGG16 and the test dataset; correlation threshold=0.75,  $\log_2$  gene expression threshold=7).

| Gene          | Gene name                                                                    | Tissue with highest expression | Highest median tissue expression ( $\log_2$ ) | Best correlated feature | r     |
|---------------|------------------------------------------------------------------------------|--------------------------------|-----------------------------------------------|-------------------------|-------|
| FABP4         | fatty acid binding protein 4                                                 | Adipose - Visceral (Omentum)   | 12.6                                          | 1_14                    | 0.767 |
| CYP11B1       | cytochrome P450 family 11 subfamily B member 1                               | Adrenal Gland                  | 11.7                                          | 20_467                  | 0.852 |
| CYP17A1       | cytochrome P450 family 17 subfamily A member 1                               | Adrenal Gland                  | 12.4                                          | 20_467                  | 0.805 |
| HSD3B2        | hydroxy-delta-5-steroid dehydrogenase, 3 beta- and steroid delta-isomerase 2 | Adrenal Gland                  | 11.2                                          | 29_123                  | 0.791 |
| CYP21A2       | cytochrome P450 family 21 subfamily A member 2                               | Adrenal Gland                  | 10.7                                          | 29_123                  | 0.770 |
| STAR          | steroidogenic acute regulatory protein                                       | Adrenal Gland                  | 12.5                                          | 29_132                  | 0.770 |
| CYP11A1       | cytochrome P450 family 11 subfamily A member 1                               | Adrenal Gland                  | 9.5                                           | 29_148                  | 0.755 |
| TPM4          | tropomyosin 4                                                                | Artery - Aorta                 | 9.1                                           | 19_468                  | 0.767 |
| S100A6        | S100 calcium binding protein A6                                              | Artery - Aorta                 | 11.6                                          | 19_162                  | 0.760 |
| YAP1          | Yes1 associated transcriptional regulator                                    | Artery - Aorta                 | 7.6                                           | 19_162                  | 0.758 |
| MARVELD1      | MARVEL domain containing 1                                                   | Artery - Tibial                | 7.8                                           | 19_162                  | 0.764 |
| PTRF          | caveolae associated protein 1                                                | Artery - Tibial                | 10.1                                          | 14_129                  | 0.763 |
| GNG12         | G protein subunit gamma 12                                                   | Artery - Tibial                | 7.1                                           | 12_209                  | 0.755 |
| GABRA6        | gamma-aminobutyric acid type A receptor subunit alpha6                       | Brain - Cerebellum             | 7.5                                           | 29_447                  | 0.949 |
| ZIC4          | Zic family member 4                                                          | Brain - Cerebellum             | 7.0                                           | 29_447                  | 0.922 |
| RP11-547D24.1 |                                                                              | Brain - Cerebellum             | 7.2                                           | 29_479                  | 0.916 |
| NEUROD2       | neuronal differentiation 2                                                   | Brain - Cerebellum             | 7.2                                           | 29_463                  | 0.915 |
| GRM4          | glutamate metabotropic receptor 4                                            | Brain - Cerebellum             | 8.3                                           | 29_447                  | 0.913 |
| LINC00599     | MIR124-1 host gene                                                           | Brain - Cerebellum             | 10.0                                          | 29_463                  | 0.907 |
| NEUROD1       | neuronal differentiation 1                                                   | Brain - Cerebellum             | 7.8                                           | 29_479                  | 0.873 |
| CRTAM         | cytotoxic and regulatory T cell molecule                                     | Brain - Cerebellum             | 7.2                                           | 29_479                  | 0.868 |
| KCNJ9         | potassium inwardly rectifying channel subfamily J member 9                   | Brain - Cerebellum             | 7.1                                           | 29_463                  | 0.858 |
| TTC9B         | tetratricopeptide repeat domain 9B                                           | Brain - Cerebellum             | 7.2                                           | 27_140                  | 0.856 |
| ZIC2          | Zic family member 2                                                          | Brain - Cerebellum             | 7.9                                           | 29_463                  | 0.854 |
| GNG13         | G protein subunit gamma 13                                                   | Brain - Cerebellum             | 7.2                                           | 29_463                  | 0.854 |
| SLC12A5       | solute carrier family 12 member 5                                            | Brain - Cerebellum             | 7.5                                           | 27_140                  | 0.850 |
| ZIC1          | Zic family member 1                                                          | Brain - Cerebellum             | 8.1                                           | 29_479                  | 0.844 |
| TMEM151B      | transmembrane protein 151B                                                   | Brain - Cerebellum             | 7.7                                           | 27_140                  | 0.844 |
| ELAVL3        | ELAV like RNA binding protein 3                                              | Brain - Cerebellum             | 8.0                                           | 29_463                  | 0.834 |
| DIRAS2        | DIRAS family GTPase 2                                                        | Brain - Cerebellum             | 7.6                                           | 27_140                  | 0.831 |
| C16orf11      | proline rich 35                                                              | Brain - Cerebellum             | 7.6                                           | 29_447                  | 0.810 |
| GABRD         | gamma-aminobutyric acid type A receptor subunit delta                        | Brain - Cerebellum             | 9.1                                           | 29_463                  | 0.807 |
| GFAP          | glial fibrillary acidic protein                                              | Brain - Cerebellum             | 9.7                                           | 29_485                  | 0.804 |
| CACNA1A       | calcium voltage-gated channel subunit alpha1 A                               | Brain - Cerebellum             | 8.2                                           | 27_140                  | 0.794 |
| PVALB         | parvalbumin                                                                  | Brain - Cerebellum             | 9.1                                           | 29_463                  | 0.781 |
| HPCAL4        | hippocalcin like 4                                                           | Brain - Cerebellum             | 7.5                                           | 29_463                  | 0.781 |
| RP11-981G7.6  |                                                                              | Brain - Cerebellum             | 7.1                                           | 30_479                  | 0.770 |
| TMEM145       | transmembrane protein 145                                                    | Brain - Cerebellum             | 8.2                                           | 25_302                  | 0.766 |
| MAP6D1        | MAP6 domain containing 1                                                     | Brain - Cerebellum             | 7.1                                           | 29_463                  | 0.765 |
| CPLX2         | complexin 2                                                                  | Brain - Cerebellum             | 8.7                                           | 27_140                  | 0.762 |
| SPOCK2        | SPARC (osteonectin), cwcv and kazal like domains proteoglycan 2              | Brain - Cerebellum             | 8.6                                           | 27_148                  | 0.761 |
| AGAP2         | ArfGAP with GTPase domain, ankyrin repeat and PH domain 2                    | Brain - Cerebellum             | 8.0                                           | 29_463                  | 0.761 |
| MLC1          | modulator of VRAC current 1                                                  | Brain - Cerebellum             | 7.3                                           | 29_485                  | 0.760 |
| ATP6V1G2      | ATPase H+ transporting V1 subunit G2                                         | Brain - Cerebellum             | 9.2                                           | 29_463                  | 0.752 |
| TUBB4A        | tubulin beta 4A class IVa                                                    | Brain - Cerebellum             | 9.5                                           | 27_488                  | 0.752 |
| SLC1A2        | solute carrier family 1 member 2                                             | Brain - Cortex                 | 8.7                                           | 18_8                    | 0.844 |
| SNCB          | synuclein beta                                                               | Brain - Cortex                 | 9.2                                           | 29_485                  | 0.814 |
| GRIN1         | glutamate ionotropic receptor NMDA type subunit 1                            | Brain - Cortex                 | 7.9                                           | 18_8                    | 0.812 |
| HPCA          | hippocalcin                                                                  | Brain - Cortex                 | 7.5                                           | 29_485                  | 0.811 |

| Gene     | Gene name                                                 | Tissue with highest expression | Highest median tissue expression (log <sub>2</sub> ) | Best correlated feature | r     |
|----------|-----------------------------------------------------------|--------------------------------|------------------------------------------------------|-------------------------|-------|
| PACSIN1  | protein kinase C and casein kinase substrate in neurons 1 | Brain - Cortex                 | 8.5                                                  | 29_463                  | 0.810 |
| SLC17A7  | solute carrier family 17 member 7                         | Brain - Cortex                 | 9.3                                                  | 18_8                    | 0.799 |
| CAMK2A   | calcium/calmodulin dependent protein kinase II alpha      | Brain - Cortex                 | 9.2                                                  | 23_417                  | 0.786 |
| CABP1    | calcium binding protein 1                                 | Brain - Cortex                 | 7.3                                                  | 30_231                  | 0.779 |
| DDN      | dendrin                                                   | Brain - Cortex                 | 7.9                                                  | 25_478                  | 0.775 |
| RAPGEF4  | Rap guanine nucleotide exchange factor 4                  | Brain - Cortex                 | 7.6                                                  | 18_224                  | 0.767 |
| KCNH3    | potassium voltage-gated channel subfamily H member 3      | Brain - Cortex                 | 7.2                                                  | 20_380                  | 0.767 |
| CAMKV    | CaM kinase like vesicle associated                        | Brain - Cortex                 | 7.6                                                  | 18_8                    | 0.766 |
| NSG2     | neuronal vesicle trafficking associated 2                 | Brain - Cortex                 | 7.3                                                  | 27_278                  | 0.758 |
| CEND1    | cell cycle exit and neuronal differentiation 1            | Brain - Cortex                 | 8.6                                                  | 29_485                  | 0.755 |
| KIF5A    | kinesin family member 5A                                  | Brain - Cortex                 | 10.0                                                 | 29_485                  | 0.754 |
| GNG3     | G protein subunit gamma 3                                 | Brain - Cortex                 | 8.1                                                  | 27_278                  | 0.753 |
| SUMO2    | small ubiquitin like modifier 2                           | Cervix - Ectocervix            | 7.8                                                  | 19_468                  | 0.771 |
| DDAH2    | dimethylarginine dimethylaminohydrolase 2                 | Cervix - Ectocervix            | 7.8                                                  | 19_162                  | 0.765 |
| CYBRD1   | cytochrome b reductase 1                                  | Cervix - Ectocervix            | 8.7                                                  | 19_162                  | 0.763 |
| NBL1     | NBL1, DAN family BMP antagonist                           | Cervix - Ectocervix            | 9.6                                                  | 19_162                  | 0.758 |
| CRTAP    | cartilage associated protein                              | Cervix - Ectocervix            | 8.1                                                  | 12_223                  | 0.756 |
| HNRNPUL1 | heterogeneous nuclear ribonucleoprotein U like 1          | Cervix - Ectocervix            | 7.2                                                  | 19_468                  | 0.754 |
| HMGB1    | high mobility group box 1                                 | Cervix - Ectocervix            | 7.4                                                  | 19_468                  | 0.753 |
| PTMA     | prothymosin alpha                                         | Cervix - Endocervix            | 10.1                                                 | 19_468                  | 0.802 |
| PIAS3    | protein inhibitor of activated STAT 3                     | Cervix - Endocervix            | 7.0                                                  | 19_468                  | 0.764 |
| SPIN1    | spindlin 1                                                | Cervix - Endocervix            | 7.2                                                  | 19_333                  | 0.752 |
| PLXNB2   | plexin B2                                                 | Cervix - Endocervix            | 8.0                                                  | 12_164                  | 0.750 |
| TACR2    | tachykinin receptor 2                                     | Colon - Sigmoid                | 7.8                                                  | 23_97                   | 0.753 |
| MANBAL   | mannosidase beta like                                     | Fallopian Tube                 | 7.0                                                  | 21_493                  | 0.752 |
| NKX2-5   | NK2 homeobox 5                                            | Heart - Atrial Appendage       | 7.0                                                  | 30_214                  | 0.903 |
| BMP10    | bone morphogenetic protein 10                             | Heart - Atrial Appendage       | 8.3                                                  | 29_313                  | 0.855 |
| NPPA     | natriuretic peptide A                                     | Heart - Atrial Appendage       | 14.9                                                 | 29_481                  | 0.777 |
| MYL4     | myosin light chain 4                                      | Heart - Atrial Appendage       | 11.2                                                 | 29_6                    | 0.755 |
| TECRL    | trans-2,3-enoyl-CoA reductase like                        | Heart - Atrial Appendage       | 7.1                                                  | 11_75                   | 0.753 |
| NMRK2    | nicotinamide riboside kinase 2                            | Heart - Atrial Appendage       | 9.8                                                  | 30_72                   | 0.751 |
| MYBPC3   | myosin binding protein C3                                 | Heart - Left Ventricle         | 10.8                                                 | 23_270                  | 0.783 |
| TNNI3    | troponin I3, cardiac type                                 | Heart - Left Ventricle         | 12.0                                                 | 25_28                   | 0.780 |
| XIRP1    | xin actin binding repeat containing 1                     | Heart - Left Ventricle         | 7.4                                                  | 30_72                   | 0.770 |
| TNNT2    | troponin T2, cardiac type                                 | Heart - Left Ventricle         | 11.6                                                 | 25_31                   | 0.759 |
| CSRP3    | cysteine and glycine rich protein 3                       | Heart - Left Ventricle         | 9.4                                                  | 30_72                   | 0.755 |
| AQP2     | aquaporin 2                                               | Kidney - Cortex                | 7.6                                                  | 29_280                  | 0.890 |
| MIOX     | myo-inositol oxygenase                                    | Kidney - Cortex                | 7.1                                                  | 29_488                  | 0.888 |
| UMOD     | uromodulin                                                | Kidney - Cortex                | 7.4                                                  | 27_274                  | 0.874 |
| NAT8     | N-acetyltransferase 8 (putative)                          | Kidney - Cortex                | 7.2                                                  | 30_20                   | 0.827 |
| CDH16    | cadherin 16                                               | Kidney - Cortex                | 8.7                                                  | 30_488                  | 0.816 |
| FXYP4    | FXYP domain containing ion transport regulator 4          | Kidney - Cortex                | 7.2                                                  | 30_280                  | 0.782 |
| F9       | coagulation factor IX                                     | Liver                          | 8.1                                                  | 29_192                  | 0.975 |
| C8A      | complement C8 alpha chain                                 | Liver                          | 8.0                                                  | 29_192                  | 0.973 |
| HAO1     | hydroxyacid oxidase 1                                     | Liver                          | 8.0                                                  | 29_192                  | 0.968 |
| CFHR2    | complement factor H related 2                             | Liver                          | 8.2                                                  | 29_192                  | 0.966 |
| C9       | complement C9                                             | Liver                          | 8.8                                                  | 29_192                  | 0.962 |
| PLG      | plasminogen                                               | Liver                          | 8.7                                                  | 29_234                  | 0.959 |
| C3P1     | complement component 3 precursor pseudogene               | Liver                          | 7.8                                                  | 29_192                  | 0.957 |
| AKR1C4   | aldo-keto reductase family 1 member C4                    | Liver                          | 7.2                                                  | 29_192                  | 0.956 |
| APOF     | apolipoprotein F                                          | Liver                          | 7.2                                                  | 29_192                  | 0.956 |
| SLC25A47 | solute carrier family 25 member 47                        | Liver                          | 8.6                                                  | 29_234                  | 0.954 |
| APOA5    | apolipoprotein A5                                         | Liver                          | 8.8                                                  | 29_192                  | 0.954 |
| SERPINC1 | serpin family C member 1                                  | Liver                          | 10.1                                                 | 29_192                  | 0.952 |
| HRG      | histidine rich glycoprotein                               | Liver                          | 9.2                                                  | 29_234                  | 0.952 |
| F2       | coagulation factor II, thrombin                           | Liver                          | 9.4                                                  | 29_192                  | 0.949 |

| Gene      | Gene name                                                  | Tissue with highest expression | Highest median tissue expression ( $\log_2$ ) | Best correlated feature | r     |
|-----------|------------------------------------------------------------|--------------------------------|-----------------------------------------------|-------------------------|-------|
| APOC4     | apolipoprotein C4                                          | Liver                          | 7.8                                           | 29_192                  | 0.949 |
| SERPINA10 | serpin family A member 10                                  | Liver                          | 7.6                                           | 29_192                  | 0.948 |
| AHSG      | alpha 2-HS glycoprotein                                    | Liver                          | 10.7                                          | 29_192                  | 0.946 |
| AFM       | afamin                                                     | Liver                          | 7.9                                           | 29_234                  | 0.946 |
| APCS      | amyloid P component, serum                                 | Liver                          | 10.7                                          | 29_192                  | 0.942 |
| C8B       | complement C8 beta chain                                   | Liver                          | 8.2                                           | 29_192                  | 0.941 |
| AGXT      | alanine--glyoxylate and serine--pyruvate aminotransferase  | Liver                          | 10.9                                          | 29_234                  | 0.939 |
| CYP8B1    | cytochrome P450 family 8 subfamily B member 1              | Liver                          | 8.1                                           | 29_234                  | 0.938 |
| BAAT      | bile acid-CoA:amino acid N-acyltransferase                 | Liver                          | 7.7                                           | 29_192                  | 0.938 |
| ITIH1     | inter-alpha-trypsin inhibitor heavy chain 1                | Liver                          | 9.1                                           | 29_192                  | 0.937 |
| ANGPTL3   | angiopoietin like 3                                        | Liver                          | 7.3                                           | 29_234                  | 0.934 |
| SLC22A1   | solute carrier family 22 member 1                          | Liver                          | 9.1                                           | 30_192                  | 0.933 |
| APOA2     | apolipoprotein A2                                          | Liver                          | 12.2                                          | 29_192                  | 0.931 |
| CYP4A11   | cytochrome P450 family 4 subfamily A member 11             | Liver                          | 8.3                                           | 29_234                  | 0.924 |
| CPB2      | carboxypeptidase B2                                        | Liver                          | 8.5                                           | 29_192                  | 0.922 |
| ACSM2A    | acyl-CoA synthetase medium chain family member 2A          | Liver                          | 7.4                                           | 23_292                  | 0.920 |
| PROC      | protein C, inactivator of coagulation factors Va and VIIIa | Liver                          | 7.9                                           | 29_234                  | 0.919 |
| APOH      | apolipoprotein H                                           | Liver                          | 11.7                                          | 29_234                  | 0.919 |
| ACSM2B    | acyl-CoA synthetase medium chain family member 2B          | Liver                          | 7.4                                           | 23_292                  | 0.919 |
| SLC22A7   | solute carrier family 22 member 7                          | Liver                          | 7.7                                           | 29_234                  | 0.900 |
| CPN2      | carboxypeptidase N subunit 2                               | Liver                          | 7.3                                           | 29_234                  | 0.900 |
| KNG1      | kininogen 1                                                | Liver                          | 8.6                                           | 30_234                  | 0.897 |
| FGB       | fibrinogen beta chain                                      | Liver                          | 12.6                                          | 29_192                  | 0.896 |
| HPX       | hemopexin                                                  | Liver                          | 11.1                                          | 30_192                  | 0.895 |
| CYP2A6    | cytochrome P450 family 2 subfamily A member 6              | Liver                          | 9.6                                           | 29_192                  | 0.888 |
| ITIH2     | inter-alpha-trypsin inhibitor heavy chain 2                | Liver                          | 7.7                                           | 29_192                  | 0.885 |
| PON1      | paraoxonase 1                                              | Liver                          | 7.2                                           | 18_279                  | 0.885 |
| TAT       | tyrosine aminotransferase                                  | Liver                          | 9.2                                           | 29_192                  | 0.884 |
| FGL1      | fibrinogen like 1                                          | Liver                          | 10.2                                          | 18_231                  | 0.879 |
| SERPINA11 | serpin family A member 11                                  | Liver                          | 7.8                                           | 29_192                  | 0.877 |
| AMBP      | alpha-1-microglobulin/bikunin precursor                    | Liver                          | 11.7                                          | 18_231                  | 0.876 |
| G6PC      | glucose-6-phosphatase catalytic subunit                    | Liver                          | 7.1                                           | 29_234                  | 0.872 |
| GC        | GC vitamin D binding protein                               | Liver                          | 9.8                                           | 29_192                  | 0.867 |
| PAH       | phenylalanine hydroxylase                                  | Liver                          | 8.2                                           | 22_418                  | 0.863 |
| SULT2A1   | sulfotransferase family 2A member 1                        | Liver                          | 8.6                                           | 29_30                   | 0.863 |
| APOC1P1   | apolipoprotein C1 pseudogene 1                             | Liver                          | 7.0                                           | 30_30                   | 0.859 |
| FGA       | fibrinogen alpha chain                                     | Liver                          | 12.2                                          | 30_192                  | 0.858 |
| ASGR2     | asialoglycoprotein receptor 2                              | Liver                          | 8.8                                           | 30_192                  | 0.854 |
| CRP       | C-reactive protein                                         | Liver                          | 12.6                                          | 29_192                  | 0.852 |
| VTN       | vitronectin                                                | Liver                          | 11.2                                          | 18_279                  | 0.851 |
| TTR       | transthyretin                                              | Liver                          | 11.1                                          | 18_231                  | 0.850 |
| SLC2A2    | solute carrier family 2 member 2                           | Liver                          | 7.2                                           | 29_234                  | 0.849 |
| SLC13A5   | solute carrier family 13 member 5                          | Liver                          | 8.4                                           | 27_275                  | 0.845 |
| BHMT      | betaine--homocysteine S-methyltransferase                  | Liver                          | 8.5                                           | 23_292                  | 0.844 |
| APOC3     | apolipoprotein C3                                          | Liver                          | 13.0                                          | 29_192                  | 0.840 |
| ALB       | albumin                                                    | Liver                          | 15.1                                          | 18_231                  | 0.840 |
| ADH1A     | alcohol dehydrogenase 1A (class I), alpha polypeptide      | Liver                          | 8.0                                           | 29_192                  | 0.835 |
| TDO2      | tryptophan 2,3-dioxygenase                                 | Liver                          | 7.7                                           | 30_205                  | 0.834 |
| CYP2B6    | cytochrome P450 family 2 subfamily B member 6              | Liver                          | 7.3                                           | 29_234                  | 0.834 |
| SLC27A5   | solute carrier family 27 member 5                          | Liver                          | 8.0                                           | 29_192                  | 0.832 |
| C8G       | complement C8 gamma chain                                  | Liver                          | 8.7                                           | 30_192                  | 0.831 |
| RDH16     | retinol dehydrogenase 16                                   | Liver                          | 7.9                                           | 30_75                   | 0.830 |
| ORM1      | orosomuroid 1                                              | Liver                          | 12.5                                          | 30_192                  | 0.829 |
| FGG       | fibrinogen gamma chain                                     | Liver                          | 12.2                                          | 30_192                  | 0.829 |
| TFR2      | transferrin receptor 2                                     | Liver                          | 8.8                                           | 27_275                  | 0.828 |
| ORM2      | orosomuroid 2                                              | Liver                          | 11.3                                          | 30_192                  | 0.826 |

| Gene          | Gene name                                                                 | Tissue with highest expression | Highest median tissue expression (log <sub>2</sub> ) | Best correlated feature | r     |
|---------------|---------------------------------------------------------------------------|--------------------------------|------------------------------------------------------|-------------------------|-------|
| C4BPA         | complement component 4 binding protein alpha                              | Liver                          | 8.4                                                  | 27_380                  | 0.823 |
| CYP2C8        | cytochrome P450 family 2 subfamily C member 8                             | Liver                          | 9.5                                                  | 23_492                  | 0.821 |
| CFHR1         | complement factor H related 1                                             | Liver                          | 8.1                                                  | 29_192                  | 0.821 |
| DPYS          | dihydropyrimidinase                                                       | Liver                          | 7.1                                                  | 18_249                  | 0.819 |
| UGT2B7        | UDP glucuronosyltransferase family 2 member B7                            | Liver                          | 7.2                                                  | 23_292                  | 0.819 |
| CYP2E1        | cytochrome P450 family 2 subfamily E member 1                             | Liver                          | 11.1                                                 | 30_192                  | 0.817 |
| SERPIND1      | serpin family D member 1                                                  | Liver                          | 7.6                                                  | 29_192                  | 0.810 |
| SERPINA6      | serpin family A member 6                                                  | Liver                          | 7.7                                                  | 29_234                  | 0.806 |
| MAT1A         | methionine adenosyltransferase 1A                                         | Liver                          | 9.7                                                  | 20_471                  | 0.806 |
| F12           | coagulation factor XII                                                    | Liver                          | 8.7                                                  | 30_75                   | 0.804 |
| IGFBP1        | insulin like growth factor binding protein 1                              | Liver                          | 7.2                                                  | 29_75                   | 0.802 |
| ASGR1         | asialoglycoprotein receptor 1                                             | Liver                          | 8.7                                                  | 27_275                  | 0.798 |
| ADH4          | alcohol dehydrogenase 4 (class II), pi polypeptide                        | Liver                          | 9.1                                                  | 29_192                  | 0.787 |
| APOB          | apolipoprotein B                                                          | Liver                          | 8.5                                                  | 30_438                  | 0.784 |
| SLC38A4       | solute carrier family 38 member 4                                         | Liver                          | 7.3                                                  | 29_192                  | 0.780 |
| SAA4          | serum amyloid A4, constitutive                                            | Liver                          | 10.4                                                 | 29_192                  | 0.778 |
| CREB3L3       | cAMP responsive element binding protein 3 like 3                          | Liver                          | 8.2                                                  | 20_481                  | 0.777 |
| CPS1          | carbamoyl-phosphate synthase 1                                            | Liver                          | 8.6                                                  | 29_192                  | 0.775 |
| SDS           | serine dehydratase                                                        | Liver                          | 8.9                                                  | 27_275                  | 0.769 |
| ARG1          | arginase 1                                                                | Liver                          | 9.0                                                  | 20_194                  | 0.768 |
| CYP2C9        | cytochrome P450 family 2 subfamily C member 9                             | Liver                          | 8.6                                                  | 20_481                  | 0.768 |
| A1BG          | alpha-1-B glycoprotein                                                    | Liver                          | 8.9                                                  | 30_192                  | 0.768 |
| HPD           | 4-hydroxyphenylpyruvate dioxygenase                                       | Liver                          | 10.1                                                 | 30_234                  | 0.761 |
| APOM          | apolipoprotein M                                                          | Liver                          | 7.2                                                  | 29_234                  | 0.753 |
| SFTPA1        | surfactant protein A1                                                     | Lung                           | 10.4                                                 | 30_155                  | 0.849 |
| SFTPC         | surfactant protein C                                                      | Lung                           | 9.8                                                  | 30_155                  | 0.838 |
| SFTPA2        | surfactant protein A2                                                     | Lung                           | 10.6                                                 | 30_155                  | 0.803 |
| SCGB3A2       | secretoglobin family 3A member 2                                          | Lung                           | 7.7                                                  | 29_471                  | 0.791 |
| SFTPB         | surfactant protein B                                                      | Lung                           | 12.2                                                 | 29_383                  | 0.789 |
| SCGB1A1       | secretoglobin family 1A member 1                                          | Lung                           | 9.2                                                  | 29_155                  | 0.776 |
| NAPSA         | napsin A aspartic peptidase                                               | Lung                           | 8.8                                                  | 30_291                  | 0.774 |
| STATH         | statherin                                                                 | Minor Salivary Gland           | 7.7                                                  | 25_200                  | 0.767 |
| ID12          | isopentenyl-diphosphate delta isomerase 2                                 | Muscle - Skeletal              | 8.0                                                  | 30_161                  | 0.916 |
| RP11-451G4.2  |                                                                           | Muscle - Skeletal              | 10.3                                                 | 30_161                  | 0.883 |
| RP11-184I16.4 |                                                                           | Muscle - Skeletal              | 7.2                                                  | 30_161                  | 0.881 |
| MYF6          | myogenic factor 6                                                         | Muscle - Skeletal              | 7.2                                                  | 25_409                  | 0.872 |
| NEB           | nebulin                                                                   | Muscle - Skeletal              | 9.9                                                  | 25_409                  | 0.851 |
| PPP1R27       | protein phosphatase 1 regulatory subunit 27                               | Muscle - Skeletal              | 9.0                                                  | 30_161                  | 0.842 |
| CACNG1        | calcium voltage-gated channel auxiliary subunit gamma 1                   | Muscle - Skeletal              | 7.8                                                  | 25_409                  | 0.836 |
| XIRP2         | xin actin binding repeat containing 2                                     | Muscle - Skeletal              | 8.0                                                  | 18_102                  | 0.828 |
| RYR1          | ryanodine receptor 1                                                      | Muscle - Skeletal              | 8.6                                                  | 29_362                  | 0.827 |
| TMOD4         | tropomodulin 4                                                            | Muscle - Skeletal              | 8.6                                                  | 30_16                   | 0.827 |
| KLHL40        | kelch like family member 40                                               | Muscle - Skeletal              | 7.8                                                  | 25_409                  | 0.824 |
| MYBPC2        | myosin binding protein C2                                                 | Muscle - Skeletal              | 9.4                                                  | 30_161                  | 0.822 |
| SMTNL1        | smoothelin like 1                                                         | Muscle - Skeletal              | 7.2                                                  | 30_362                  | 0.820 |
| TTN           | titin                                                                     | Muscle - Skeletal              | 8.7                                                  | 18_136                  | 0.810 |
| MYH1          | myosin heavy chain 1                                                      | Muscle - Skeletal              | 10.3                                                 | 25_409                  | 0.808 |
| MYPN          | myopalladin                                                               | Muscle - Skeletal              | 7.3                                                  | 30_72                   | 0.805 |
| LMOD3         | leiomodlin 3                                                              | Muscle - Skeletal              | 7.4                                                  | 18_136                  | 0.802 |
| MYLPF         | myosin light chain, phosphorylatable, fast skeletal muscle                | Muscle - Skeletal              | 10.9                                                 | 30_161                  | 0.798 |
| LMOD2         | leiomodlin 2                                                              | Muscle - Skeletal              | 8.9                                                  | 30_72                   | 0.798 |
| NRAP          | nebulin related anchoring protein                                         | Muscle - Skeletal              | 10.0                                                 | 18_136                  | 0.794 |
| MYL1          | myosin light chain 1                                                      | Muscle - Skeletal              | 11.2                                                 | 30_161                  | 0.789 |
| ATP2A1        | ATPase sarcoplasmic/endoplasmic reticulum Ca <sup>2+</sup> transporting 1 | Muscle - Skeletal              | 10.0                                                 | 30_161                  | 0.784 |
| TNNC2         | troponin C2, fast skeletal type                                           | Muscle - Skeletal              | 12.5                                                 | 30_161                  | 0.782 |
| MYL2          | myosin light chain 2                                                      | Muscle - Skeletal              | 13.7                                                 | 18_136                  | 0.781 |

| Gene          | Gene name                                                                   | Tissue with highest expression | Highest median tissue expression ( $\log_2$ ) | Best correlated feature | r     |
|---------------|-----------------------------------------------------------------------------|--------------------------------|-----------------------------------------------|-------------------------|-------|
| RP11-357D18.1 |                                                                             | Muscle - Skeletal              | 7.3                                           | 27_117                  | 0.779 |
| AMPD1         | adenosine monophosphate deaminase 1                                         | Muscle - Skeletal              | 8.5                                           | 30_16                   | 0.779 |
| MYH2          | myosin heavy chain 2                                                        | Muscle - Skeletal              | 9.4                                           | 30_505                  | 0.779 |
| MYLK2         | myosin light chain kinase 2                                                 | Muscle - Skeletal              | 7.7                                           | 30_161                  | 0.777 |
| TNNT1         | troponin T1, slow skeletal type                                             | Muscle - Skeletal              | 12.5                                          | 18_272                  | 0.776 |
| TRIM63        | tripartite motif containing 63                                              | Muscle - Skeletal              | 9.6                                           | 18_136                  | 0.776 |
| TNNI1         | troponin I1, slow skeletal type                                             | Muscle - Skeletal              | 10.0                                          | 30_161                  | 0.773 |
| HFE2          | hemojuvelin BMP co-receptor                                                 | Muscle - Skeletal              | 7.8                                           | 20_305                  | 0.773 |
| MB            | myoglobin                                                                   | Muscle - Skeletal              | 13.1                                          | 30_72                   | 0.772 |
| MYH7          | myosin heavy chain 7                                                        | Muscle - Skeletal              | 12.4                                          | 18_136                  | 0.770 |
| RPL3L         | ribosomal protein L3 like                                                   | Muscle - Skeletal              | 8.2                                           | 27_409                  | 0.767 |
| KLHL41        | kelch like family member 41                                                 | Muscle - Skeletal              | 11.6                                          | 20_171                  | 0.766 |
| COX6A2        | cytochrome c oxidase subunit 6A2                                            | Muscle - Skeletal              | 11.5                                          | 30_72                   | 0.759 |
| SLN           | sarcolipin                                                                  | Muscle - Skeletal              | 10.9                                          | 30_72                   | 0.758 |
| ANP32B        | acidic nuclear phosphoprotein 32 family member B                            | Nerve - Tibial                 | 8.2                                           | 19_468                  | 0.775 |
| CNTF          | ciliary neurotrophic factor                                                 | Nerve - Tibial                 | 8.3                                           | 29_36                   | 0.769 |
| AHNAK         | AHNAK nucleoprotein                                                         | Nerve - Tibial                 | 10.0                                          | 14_162                  | 0.754 |
| MXRA8         | matrix remodeling associated 8                                              | Nerve - Tibial                 | 8.5                                           | 19_468                  | 0.751 |
| RPL22         | ribosomal protein L22                                                       | Ovary                          | 8.9                                           | 19_468                  | 0.779 |
| ZFAS1         | ZNFX1 antisense RNA 1                                                       | Ovary                          | 8.8                                           | 19_468                  | 0.775 |
| EEF1A1        | eukaryotic translation elongation factor 1 alpha 1                          | Ovary                          | 12.3                                          | 12_164                  | 0.774 |
| RPL3          | ribosomal protein L3                                                        | Ovary                          | 12.2                                          | 12_164                  | 0.765 |
| HNRNPA1       | heterogeneous nuclear ribonucleoprotein A1                                  | Ovary                          | 10.0                                          | 19_468                  | 0.754 |
| RPL15         | ribosomal protein L15                                                       | Ovary                          | 9.8                                           | 19_468                  | 0.753 |
| CLTA          | clathrin light chain A                                                      | Ovary                          | 7.5                                           | 19_321                  | 0.752 |
| PNLIPRP1      | pancreatic lipase related protein 1                                         | Pancreas                       | 11.5                                          | 18_425                  | 0.944 |
| SERPINI2      | serpin family I member 2                                                    | Pancreas                       | 8.0                                           | 29_467                  | 0.941 |
| RBPJL         | recombination signal binding protein for immunoglobulin kappa J region like | Pancreas                       | 9.5                                           | 30_467                  | 0.935 |
| CTRC          | chymotrypsin C                                                              | Pancreas                       | 12.5                                          | 30_467                  | 0.933 |
| RP11-331F4.4  |                                                                             | Pancreas                       | 11.6                                          | 18_425                  | 0.932 |
| AMY2A         | amylase alpha 2A                                                            | Pancreas                       | 13.1                                          | 30_467                  | 0.928 |
| CELA2B        | chymotrypsin like elastase 2B                                               | Pancreas                       | 11.3                                          | 30_467                  | 0.917 |
| INS           | insulin                                                                     | Pancreas                       | 10.8                                          | 18_158                  | 0.913 |
| SYCN          | syncollin                                                                   | Pancreas                       | 13.8                                          | 30_290                  | 0.902 |
| CELA2A        | chymotrypsin like elastase 2A                                               | Pancreas                       | 12.6                                          | 23_110                  | 0.895 |
| CUZD1         | CUB and zona pellucida like domains 1                                       | Pancreas                       | 8.9                                           | 22_324                  | 0.895 |
| CTRL          | chymotrypsin like                                                           | Pancreas                       | 10.8                                          | 20_292                  | 0.893 |
| CELP          | carboxyl ester lipase pseudogene                                            | Pancreas                       | 8.0                                           | 23_324                  | 0.893 |
| CELA3B        | chymotrypsin like elastase 3B                                               | Pancreas                       | 13.2                                          | 18_425                  | 0.881 |
| CEL           | carboxyl ester lipase                                                       | Pancreas                       | 14.0                                          | 23_324                  | 0.866 |
| CTRB1         | chymotrypsinogen B1                                                         | Pancreas                       | 14.3                                          | 18_158                  | 0.861 |
| PRSS3P2       | PRSS3 pseudogene 2                                                          | Pancreas                       | 13.4                                          | 18_123                  | 0.861 |
| PNLIPRP2      | pancreatic lipase related protein 2 (gene/pseudogene)                       | Pancreas                       | 12.6                                          | 18_123                  | 0.851 |
| CPA2          | carboxypeptidase A2                                                         | Pancreas                       | 13.7                                          | 18_123                  | 0.850 |
| PLA2G1B       | phospholipase A2 group 1B                                                   | Pancreas                       | 14.4                                          | 18_158                  | 0.846 |
| CTRB2         | chymotrypsinogen B2                                                         | Pancreas                       | 14.3                                          | 18_158                  | 0.845 |
| PRSS3P1       | PRSS3 pseudogene 1                                                          | Pancreas                       | 13.5                                          | 18_123                  | 0.844 |
| PNLIP         | pancreatic lipase                                                           | Pancreas                       | 16.2                                          | 18_123                  | 0.831 |
| GP2           | glycoprotein 2                                                              | Pancreas                       | 13.6                                          | 18_483                  | 0.828 |
| CELA3A        | chymotrypsin like elastase 3A                                               | Pancreas                       | 15.0                                          | 18_123                  | 0.828 |
| CPB1          | carboxypeptidase B1                                                         | Pancreas                       | 14.4                                          | 18_137                  | 0.822 |
| RP11-133O22.6 |                                                                             | Pancreas                       | 8.3                                           | 30_290                  | 0.819 |
| CPA1          | carboxypeptidase A1                                                         | Pancreas                       | 15.9                                          | 18_158                  | 0.819 |

| Gene         | Gene name                                       | Tissue with highest expression | Highest median tissue expression ( $\log_2$ ) | Best correlated feature | r     |
|--------------|-------------------------------------------------|--------------------------------|-----------------------------------------------|-------------------------|-------|
| REG3G        | regenerating family member 3 gamma              | Pancreas                       | 9.6                                           | 30_290                  | 0.815 |
| CLPS         | colipase                                        | Pancreas                       | 16.2                                          | 18_123                  | 0.808 |
| RP6-149D17.1 |                                                 | Pancreas                       | 7.8                                           | 30_467                  | 0.790 |
| ERP27        | endoplasmic reticulum protein 27                | Pancreas                       | 8.6                                           | 18_377                  | 0.780 |
| PRSS1        | serine protease 1                               | Pancreas                       | 17.0                                          | 18_123                  | 0.768 |
| GCG          | glucagon                                        | Pancreas                       | 7.8                                           | 23_188                  | 0.767 |
| AMY2B        | amylase alpha 2B                                | Pancreas                       | 10.6                                          | 22_246                  | 0.754 |
| FSHB         | follicle stimulating hormone subunit beta       | Pituitary                      | 7.1                                           | 29_279                  | 0.930 |
| POU1F1       | POU class 1 homeobox 1                          | Pituitary                      | 7.3                                           | 29_279                  | 0.913 |
| GHRHR        | growth hormone releasing hormone receptor       | Pituitary                      | 8.9                                           | 29_279                  | 0.900 |
| TSHB         | thyroid stimulating hormone subunit beta        | Pituitary                      | 9.2                                           | 29_436                  | 0.869 |
| CGA          | glycoprotein hormones, alpha polypeptide        | Pituitary                      | 13.3                                          | 30_429                  | 0.852 |
| LHB          | luteinizing hormone subunit beta                | Pituitary                      | 12.0                                          | 30_429                  | 0.844 |
| OTOS         | otospiralin                                     | Pituitary                      | 7.2                                           | 29_413                  | 0.831 |
| MYO15A       | myosin XVA                                      | Pituitary                      | 7.2                                           | 29_436                  | 0.803 |
| PRL          | prolactin                                       | Pituitary                      | 15.5                                          | 29_436                  | 0.799 |
| POMC         | proopiomelanocortin                             | Pituitary                      | 15.0                                          | 29_279                  | 0.794 |
| RP11-566J3.4 |                                                 | Pituitary                      | 7.9                                           | 27_217                  | 0.789 |
| TGFBR3L      | transforming growth factor beta receptor 3 like | Pituitary                      | 8.0                                           | 29_436                  | 0.787 |
| ARHGAP36     | Rho GTPase activating protein 36                | Pituitary                      | 8.4                                           | 29_429                  | 0.786 |
| MIR7-3HG     | MIR7-3 host gene                                | Pituitary                      | 11.3                                          | 29_279                  | 0.763 |
| GH1          | growth hormone 1                                | Pituitary                      | 16.8                                          | 30_429                  | 0.763 |
| COL22A1      | collagen type XXII alpha 1 chain                | Pituitary                      | 7.2                                           | 30_436                  | 0.753 |
| KLK3         | kallikrein related peptidase 3                  | Prostate                       | 12.8                                          | 29_458                  | 0.900 |
| KLK2         | kallikrein related peptidase 2                  | Prostate                       | 11.5                                          | 29_193                  | 0.898 |
| KLK4         | kallikrein related peptidase 4                  | Prostate                       | 9.4                                           | 29_430                  | 0.821 |
| HOXB13       | homeobox B13                                    | Prostate                       | 7.3                                           | 30_458                  | 0.801 |
| ACPP         | acid phosphatase 3                              | Prostate                       | 10.5                                          | 30_339                  | 0.764 |
| MSMB         | microseminoprotein beta                         | Prostate                       | 10.8                                          | 30_458                  | 0.764 |
| KRT77        | keratin 77                                      | Skin - Not Sun Exposed         | 8.6                                           | 18_78                   | 0.884 |
| DCD          | dermcidin                                       | Skin - Not Sun Exposed         | 11.4                                          | 22_265                  | 0.848 |
| MUCL1        | mucin like 1                                    | Skin - Not Sun Exposed         | 9.7                                           | 18_78                   | 0.820 |
| C1orf68      | chromosome 1 open reading frame 68              | Skin - Sun Exposed             | 9.6                                           | 18_78                   | 0.884 |
| FLG2         | filaggrin family member 2                       | Skin - Sun Exposed             | 9.6                                           | 18_78                   | 0.883 |
| SERPINA12    | serpin family A member 12                       | Skin - Sun Exposed             | 8.9                                           | 18_78                   | 0.880 |
| LCE2C        | late cornified envelope 2C                      | Skin - Sun Exposed             | 8.2                                           | 18_78                   | 0.878 |
| LCE1A        | late cornified envelope 1A                      | Skin - Sun Exposed             | 8.9                                           | 18_78                   | 0.878 |
| CDSN         | corneodesmosin                                  | Skin - Sun Exposed             | 8.3                                           | 18_78                   | 0.875 |
| LCE2B        | late cornified envelope 2B                      | Skin - Sun Exposed             | 9.4                                           | 18_78                   | 0.874 |
| LCE1B        | late cornified envelope 1B                      | Skin - Sun Exposed             | 8.0                                           | 18_78                   | 0.874 |
| LCE1C        | late cornified envelope 1C                      | Skin - Sun Exposed             | 9.4                                           | 18_78                   | 0.873 |
| LCE6A        | late cornified envelope 6A                      | Skin - Sun Exposed             | 7.6                                           | 18_78                   | 0.870 |
| LCE1F        | late cornified envelope 1F                      | Skin - Sun Exposed             | 7.6                                           | 18_78                   | 0.868 |
| LCE5A        | late cornified envelope 5A                      | Skin - Sun Exposed             | 7.3                                           | 18_78                   | 0.864 |
| LCE2D        | late cornified envelope 2D                      | Skin - Sun Exposed             | 7.5                                           | 18_78                   | 0.863 |
| LOR          | loricrin cornified envelope precursor protein   | Skin - Sun Exposed             | 11.5                                          | 18_78                   | 0.857 |
| LCE2A        | late cornified envelope 2A                      | Skin - Sun Exposed             | 7.2                                           | 18_78                   | 0.856 |
| DSC1         | desmocollin 1                                   | Skin - Sun Exposed             | 8.2                                           | 18_78                   | 0.849 |
| KRT2         | keratin 2                                       | Skin - Sun Exposed             | 12.8                                          | 18_78                   | 0.840 |
| FLG          | filaggrin                                       | Skin - Sun Exposed             | 9.0                                           | 18_78                   | 0.835 |
| SERPINB7     | serpin family B member 7                        | Skin - Sun Exposed             | 7.4                                           | 18_78                   | 0.830 |
| KRT10        | keratin 10                                      | Skin - Sun Exposed             | 14.6                                          | 18_78                   | 0.826 |
| CASP14       | caspase 14                                      | Skin - Sun Exposed             | 9.4                                           | 18_78                   | 0.820 |
| WFDC5        | WAP four-disulfide core domain 5                | Skin - Sun Exposed             | 8.7                                           | 18_78                   | 0.818 |
| CCL27        | C-C motif chemokine ligand 27                   | Skin - Sun Exposed             | 7.2                                           | 18_78                   | 0.812 |
| PSAPL1       | prosaposin like 1                               | Skin - Sun Exposed             | 7.4                                           | 22_265                  | 0.812 |

| Gene         | Gene name                                                        | Tissue with highest expression   | Highest median tissue expression ( $\log_2$ ) | Best correlated feature | r     |
|--------------|------------------------------------------------------------------|----------------------------------|-----------------------------------------------|-------------------------|-------|
| THEM5        | thioesterase superfamily member 5                                | Skin - Sun Exposed               | 7.9                                           | 18_78                   | 0.795 |
| KPRP         | keratinocyte proline rich protein                                | Skin - Sun Exposed               | 9.2                                           | 18_78                   | 0.794 |
| PSORS1C2     | psoriasis susceptibility 1 candidate 2                           | Skin - Sun Exposed               | 7.7                                           | 18_78                   | 0.781 |
| CST6         | cystatin E/M                                                     | Skin - Sun Exposed               | 9.6                                           | 20_329                  | 0.773 |
| ASPRV1       | aspartic peptidase retroviral like 1                             | Skin - Sun Exposed               | 9.6                                           | 18_78                   | 0.772 |
| LY6G6C       | lymphocyte antigen 6 family member G6C                           | Skin - Sun Exposed               | 9.5                                           | 25_227                  | 0.757 |
| ALOX12B      | arachidonate 12-lipoxygenase, 12R type                           | Skin - Sun Exposed               | 7.4                                           | 25_227                  | 0.757 |
| SPINK4       | serine peptidase inhibitor Kazal type 4                          | Small Intestine - Terminal Ileum | 7.7                                           | 29_390                  | 0.765 |
| CD5L         | CD5 molecule like                                                | Spleen                           | 9.2                                           | 22_385                  | 0.936 |
| NR5A1        | nuclear receptor subfamily 5 group A member 1                    | Spleen                           | 8.0                                           | 27_423                  | 0.780 |
| CD19         | CD19 molecule                                                    | Spleen                           | 7.9                                           | 27_389                  | 0.759 |
| GIF          | cobalamin binding intrinsic factor                               | Stomach                          | 10.8                                          | 29_287                  | 0.877 |
| PGA4         | pepsinogen A4                                                    | Stomach                          | 9.3                                           | 29_287                  | 0.872 |
| ATP4B        | ATPase H+/K+ transporting subunit beta                           | Stomach                          | 10.6                                          | 29_287                  | 0.865 |
| PGA5         | pepsinogen A5                                                    | Stomach                          | 8.8                                           | 29_287                  | 0.864 |
| PGA3         | pepsinogen A3                                                    | Stomach                          | 8.5                                           | 29_287                  | 0.816 |
| MUC5AC       | mucin 5AC, oligomeric mucus/gel-forming                          | Stomach                          | 10.5                                          | 29_287                  | 0.811 |
| TFF2         | trefoil factor 2                                                 | Stomach                          | 11.2                                          | 29_287                  | 0.801 |
| GKN1         | gastrokine 1                                                     | Stomach                          | 12.2                                          | 29_287                  | 0.791 |
| KCNE2        | potassium voltage-gated channel subfamily E regulatory subunit 2 | Stomach                          | 8.3                                           | 29_287                  | 0.782 |
| DDX4         | DEAD-box helicase 4                                              | Testis                           | 7.5                                           | 29_39                   | 0.951 |
| HDGFL1       | HDGF like 1                                                      | Testis                           | 7.5                                           | 29_39                   | 0.951 |
| DMRTB1       | DMRT like family B with proline rich C-terminal 1                | Testis                           | 7.1                                           | 29_39                   | 0.949 |
| FAM71F1      | family with sequence similarity 71 member F1                     | Testis                           | 7.4                                           | 29_39                   | 0.947 |
| SHCBP1L      | SHC binding and spindle associated 1 like                        | Testis                           | 7.7                                           | 29_39                   | 0.945 |
| AC114783.1   |                                                                  | Testis                           | 7.0                                           | 29_73                   | 0.945 |
| CALR3        | calreticulin 3                                                   | Testis                           | 7.1                                           | 29_246                  | 0.945 |
| LYPD4        | LY6/PLAUR domain containing 4                                    | Testis                           | 7.8                                           | 29_39                   | 0.945 |
| SPACA7       | sperm acrosome associated 7                                      | Testis                           | 7.3                                           | 29_246                  | 0.945 |
| LINC00917    | long intergenic non-protein coding RNA 917                       | Testis                           | 7.7                                           | 29_246                  | 0.944 |
| ANKRD7       | ankyrin repeat domain 7                                          | Testis                           | 9.6                                           | 29_39                   | 0.944 |
| PRED58       |                                                                  | Testis                           | 7.8                                           | 29_39                   | 0.943 |
| LYZL2        | lysozyme like 2                                                  | Testis                           | 7.1                                           | 29_73                   | 0.943 |
| IQCF2        | IQ motif containing F2                                           | Testis                           | 7.5                                           | 29_246                  | 0.943 |
| LINC00202-2  | family with sequence similarity 238 member B                     | Testis                           | 7.6                                           | 29_246                  | 0.942 |
| GK2          | glycerol kinase 2                                                | Testis                           | 7.1                                           | 29_73                   | 0.942 |
| TSPAN16      | tetraspanin 16                                                   | Testis                           | 7.3                                           | 29_246                  | 0.942 |
| CETN1        | centrin 1                                                        | Testis                           | 8.8                                           | 29_39                   | 0.942 |
| TEX33        | testis expressed 33                                              | Testis                           | 7.2                                           | 29_246                  | 0.942 |
| ZPBP2        | zona pellucida binding protein 2                                 | Testis                           | 7.2                                           | 29_39                   | 0.941 |
| RP11-71E19.5 |                                                                  | Testis                           | 7.1                                           | 29_246                  | 0.941 |
| RP11-404K5.2 |                                                                  | Testis                           | 7.0                                           | 29_39                   | 0.940 |
| PDCL2        | phosducin like 2                                                 | Testis                           | 7.0                                           | 29_168                  | 0.940 |
| DEFB123      | defensin beta 123                                                | Testis                           | 7.7                                           | 29_39                   | 0.940 |
| TMCO2        | transmembrane and coiled-coil domains 2                          | Testis                           | 7.6                                           | 29_246                  | 0.940 |
| TEX37        | testis expressed 37                                              | Testis                           | 7.3                                           | 29_246                  | 0.940 |
| KIF2B        | kinesin family member 2B                                         | Testis                           | 7.3                                           | 29_73                   | 0.940 |
| SPERT        | chibby family member 2                                           | Testis                           | 7.3                                           | 29_73                   | 0.940 |
| CCDC70       | coiled-coil domain containing 70                                 | Testis                           | 8.3                                           | 29_246                  | 0.940 |
| PPP1R2P9     | PPP1R2C family member C                                          | Testis                           | 7.3                                           | 29_73                   | 0.939 |
| ACTL9        | actin like 9                                                     | Testis                           | 8.2                                           | 29_246                  | 0.939 |
| SPEM1        | spermatid maturation 1                                           | Testis                           | 7.5                                           | 29_246                  | 0.939 |
| ACTL7B       | actin like 7B                                                    | Testis                           | 8.3                                           | 29_246                  | 0.938 |
| ZNRF4        | zinc and ring finger 4                                           | Testis                           | 8.4                                           | 29_246                  | 0.938 |
| ACSBG2       | acyl-CoA synthetase bubblegum family member 2                    | Testis                           | 8.0                                           | 29_39                   | 0.938 |
| C17orf74     | SPEM family member 2                                             | Testis                           | 8.3                                           | 29_246                  | 0.938 |

| Gene         | Gene name                                               | Tissue with highest expression | Highest median tissue expression ( $\log_2$ ) | Best correlated feature | r     |
|--------------|---------------------------------------------------------|--------------------------------|-----------------------------------------------|-------------------------|-------|
| IRGC         | immunity related GTPase cinema                          | Testis                         | 8.5                                           | 29_39                   | 0.937 |
| SPATA19      | spermatogenesis associated 19                           | Testis                         | 8.0                                           | 29_168                  | 0.937 |
| TEX38        | testis expressed 38                                     | Testis                         | 8.9                                           | 29_39                   | 0.937 |
| C10orf62     | chromosome 10 open reading frame 62                     | Testis                         | 9.3                                           | 29_39                   | 0.937 |
| ACTRT2       | actin related protein T2                                | Testis                         | 8.8                                           | 29_246                  | 0.937 |
| RNF151       | ring finger protein 151                                 | Testis                         | 8.5                                           | 29_39                   | 0.937 |
| C17orf64     | chromosome 17 open reading frame 64                     | Testis                         | 7.9                                           | 29_39                   | 0.937 |
| RP11-314A5.3 |                                                         | Testis                         | 7.6                                           | 29_246                  | 0.937 |
| C2orf53      | proline rich 30                                         | Testis                         | 8.3                                           | 29_73                   | 0.936 |
| PGK2         | phosphoglycerate kinase 2                               | Testis                         | 8.3                                           | 29_39                   | 0.936 |
| UBQLN3       | ubiquilin 3                                             | Testis                         | 8.4                                           | 29_246                  | 0.935 |
| BOD1L2       | biorientation of chromosomes in cell division 1 like 2  | Testis                         | 9.2                                           | 29_39                   | 0.935 |
| FNDC8        | fibronectin type III domain containing 8                | Testis                         | 7.2                                           | 29_246                  | 0.934 |
| SPATA42      | spermatogenesis associated 42                           | Testis                         | 7.8                                           | 29_246                  | 0.934 |
| HMGB4        | high mobility group box 4                               | Testis                         | 9.1                                           | 29_73                   | 0.934 |
| DEFB119      | defensin beta 119                                       | Testis                         | 8.2                                           | 29_39                   | 0.933 |
| FSCN3        | fascin actin-bundling protein 3                         | Testis                         | 7.2                                           | 29_246                  | 0.933 |
| AKAP4        | A-kinase anchoring protein 4                            | Testis                         | 8.8                                           | 29_246                  | 0.933 |
| CCDC54       | coiled-coil domain containing 54                        | Testis                         | 8.2                                           | 29_39                   | 0.933 |
| WBSCR28      | transmembrane protein 270                               | Testis                         | 7.8                                           | 29_246                  | 0.932 |
| C2orf57      | testis expressed 44                                     | Testis                         | 8.5                                           | 29_246                  | 0.932 |
| CST9L        | cystatin 9 like                                         | Testis                         | 7.0                                           | 29_39                   | 0.932 |
| C16orf82     | chromosome 16 open reading frame 82                     | Testis                         | 9.3                                           | 29_39                   | 0.932 |
| FAM187B      | family with sequence similarity 187 member B            | Testis                         | 7.0                                           | 29_246                  | 0.932 |
| C17orf50     | chromosome 17 open reading frame 50                     | Testis                         | 7.7                                           | 29_39                   | 0.931 |
| C1orf234     | testis expressed 46                                     | Testis                         | 7.0                                           | 29_73                   | 0.931 |
| ACTL7A       | actin like 7A                                           | Testis                         | 9.1                                           | 29_73                   | 0.931 |
| SEPT12       | septin 12                                               | Testis                         | 7.8                                           | 29_39                   | 0.930 |
| SPATA8       | spermatogenesis associated 8                            | Testis                         | 9.6                                           | 29_39                   | 0.930 |
| TCP11        | t-complex 11                                            | Testis                         | 8.7                                           | 29_258                  | 0.930 |
| TUBA3C       | tubulin alpha 3c                                        | Testis                         | 10.0                                          | 29_39                   | 0.929 |
| GTSF1L       | gametocyte specific factor 1 like                       | Testis                         | 8.9                                           | 29_246                  | 0.929 |
| ODF1         | outer dense fiber of sperm tails 1                      | Testis                         | 9.6                                           | 29_39                   | 0.929 |
| SMCP         | sperm mitochondria associated cysteine rich protein     | Testis                         | 10.7                                          | 29_39                   | 0.928 |
| GSG1         | germ cell associated 1                                  | Testis                         | 8.5                                           | 29_39                   | 0.928 |
| IQCF1        | IQ motif containing F1                                  | Testis                         | 7.8                                           | 29_246                  | 0.926 |
| PRM3         | protamine 3                                             | Testis                         | 7.0                                           | 29_246                  | 0.926 |
| LINC00238    | coiled-coil domain containing 196                       | Testis                         | 7.2                                           | 29_246                  | 0.924 |
| SPATA22      | spermatogenesis associated 22                           | Testis                         | 7.2                                           | 29_39                   | 0.923 |
| TDRG1        | testis development related 1                            | Testis                         | 7.0                                           | 29_39                   | 0.923 |
| CDIPT-AS1    | CDIP transferase opposite strand, pseudogene            | Testis                         | 7.9                                           | 29_39                   | 0.922 |
| LDHC         | lactate dehydrogenase C                                 | Testis                         | 8.4                                           | 29_39                   | 0.921 |
| GAPDHS       | glyceraldehyde-3-phosphate dehydrogenase, spermatogenic | Testis                         | 8.6                                           | 29_73                   | 0.921 |
| FATE1        | fetal and adult testis expressed 1                      | Testis                         | 8.8                                           | 29_39                   | 0.920 |
| LELP1        | late cornified envelope like proline rich 1             | Testis                         | 10.8                                          | 29_73                   | 0.917 |
| SYCP3        | synaptonemal complex protein 3                          | Testis                         | 7.2                                           | 29_39                   | 0.917 |
| AC010982.1   |                                                         | Testis                         | 8.1                                           | 29_258                  | 0.916 |
| C6orf99      | chromosome 6 open reading frame 99                      | Testis                         | 7.3                                           | 29_39                   | 0.916 |
| CABS1        | calcium binding protein, spermatid associated 1         | Testis                         | 7.9                                           | 29_73                   | 0.915 |
| EPPIN        | epididymal peptidase inhibitor                          | Testis                         | 7.0                                           | 29_39                   | 0.915 |
| DKKL1        | dickkopf like acrosomal protein 1                       | Testis                         | 9.3                                           | 29_39                   | 0.914 |
| H1FNT        | H1.7 linker histone                                     | Testis                         | 9.0                                           | 29_39                   | 0.913 |
| TSACC        | TSSK6 activating cochaperone                            | Testis                         | 9.8                                           | 29_168                  | 0.912 |
| C20orf141    | chromosome 20 open reading frame 141                    | Testis                         | 7.9                                           | 29_73                   | 0.911 |
| RPL10L       | ribosomal protein L10 like                              | Testis                         | 7.5                                           | 29_246                  | 0.908 |
| SYCE3        | synaptonemal complex central element protein 3          | Testis                         | 7.9                                           | 29_39                   | 0.906 |



| Gene          | Gene name                                                       | Tissue with highest expression | Highest median tissue expression ( $\log_2$ ) | Best correlated feature | r     |
|---------------|-----------------------------------------------------------------|--------------------------------|-----------------------------------------------|-------------------------|-------|
| CAPZA3        | capping actin protein of muscle Z-line subunit alpha 3          | Testis                         | 8.7                                           | 29_258                  | 0.906 |
| GTSF1         | gametocyte specific factor 1                                    | Testis                         | 7.0                                           | 29_246                  | 0.905 |
| CCDC42        | coiled-coil domain containing 42                                | Testis                         | 7.0                                           | 29_73                   | 0.903 |
| TXNDC2        | thioredoxin domain containing 2                                 | Testis                         | 7.1                                           | 29_246                  | 0.898 |
| UBL4B         | ubiquitin like 4B                                               | Testis                         | 8.1                                           | 29_39                   | 0.897 |
| TKTL1         | transketolase like 1                                            | Testis                         | 7.7                                           | 29_39                   | 0.895 |
| SPACA3        | sperm acrosome associated 3                                     | Testis                         | 7.7                                           | 29_39                   | 0.895 |
| RBAKDN        | RBAK downstream neighbor                                        | Testis                         | 10.1                                          | 29_258                  | 0.889 |
| TPPP2         | tubulin polymerization promoting protein family member 2        | Testis                         | 8.2                                           | 29_73                   | 0.888 |
| FAM209A       | family with sequence similarity 209 member A                    | Testis                         | 7.0                                           | 29_246                  | 0.880 |
| AKAP3         | A-kinase anchoring protein 3                                    | Testis                         | 7.3                                           | 29_39                   | 0.880 |
| SPTY2D1-AS1   | SPTY2D1 opposite strand                                         | Testis                         | 7.0                                           | 29_73                   | 0.878 |
| MRV11-AS1     | IRAG1 antisense RNA 1                                           | Testis                         | 7.2                                           | 29_246                  | 0.878 |
| TEX40         | catsper channel auxiliary subunit zeta                          | Testis                         | 10.0                                          | 29_39                   | 0.877 |
| PFN4          | profilin family member 4                                        | Testis                         | 7.5                                           | 29_39                   | 0.876 |
| PRND          | prion like protein doppel                                       | Testis                         | 7.1                                           | 29_39                   | 0.876 |
| TMEM31        | transmembrane protein 31                                        | Testis                         | 7.0                                           | 29_39                   | 0.876 |
| TNP1          | transition protein 1                                            | Testis                         | 13.1                                          | 29_39                   | 0.874 |
| TSSK6         | testis specific serine kinase 6                                 | Testis                         | 8.2                                           | 29_246                  | 0.869 |
| FBXO24        | F-box protein 24                                                | Testis                         | 7.1                                           | 29_39                   | 0.868 |
| C20orf195     | fibronectin type III domain containing 11                       | Testis                         | 8.0                                           | 29_39                   | 0.867 |
| PHF7          | PHD finger protein 7                                            | Testis                         | 10.9                                          | 29_258                  | 0.867 |
| TEX101        | testis expressed 101                                            | Testis                         | 7.7                                           | 29_168                  | 0.866 |
| MAEL          | maelstrom spermatogenic transposon silencer                     | Testis                         | 7.3                                           | 29_39                   | 0.864 |
| TCP10L        | t-complex 10 like                                               | Testis                         | 8.1                                           | 29_39                   | 0.864 |
| LEMD1         | LEM domain containing 1                                         | Testis                         | 7.3                                           | 29_39                   | 0.863 |
| CCIN          | calicin                                                         | Testis                         | 7.3                                           | 29_73                   | 0.862 |
| PRAME         | PRAME nuclear receptor transcriptional regulator                | Testis                         | 7.3                                           | 30_39                   | 0.860 |
| FAM209B       | family with sequence similarity 209 member B                    | Testis                         | 7.4                                           | 29_246                  | 0.858 |
| CMTM2         | CKLF like MARVEL transmembrane domain containing 2              | Testis                         | 10.3                                          | 29_246                  | 0.851 |
| SMKR1         | small lysine rich protein 1                                     | Testis                         | 8.2                                           | 30_39                   | 0.850 |
| PRM1          | protamine 1                                                     | Testis                         | 14.3                                          | 29_73                   | 0.850 |
| PRM2          | protamine 2                                                     | Testis                         | 14.3                                          | 29_73                   | 0.849 |
| GGN           | gametogenetin                                                   | Testis                         | 7.5                                           | 29_39                   | 0.845 |
| DYNLRB2       | dynein light chain roadblock-type 2                             | Testis                         | 7.4                                           | 29_39                   | 0.845 |
| ROPN1L        | rhophilin associated tail protein 1 like                        | Testis                         | 9.0                                           | 29_39                   | 0.844 |
| TSKS          | testis specific serine kinase substrate                         | Testis                         | 8.3                                           | 29_258                  | 0.842 |
| CCDC96        | coiled-coil domain containing 96                                | Testis                         | 7.1                                           | 29_39                   | 0.842 |
| CLPB          | caseinolytic mitochondrial matrix peptidase chaperone subunit B | Testis                         | 8.2                                           | 29_372                  | 0.841 |
| CABYR         | calcium binding tyrosine phosphorylation regulated              | Testis                         | 8.0                                           | 29_39                   | 0.840 |
| RP11-758P17.3 |                                                                 | Testis                         | 7.5                                           | 29_285                  | 0.832 |
| ZMYND10       | zinc finger MYND-type containing 10                             | Testis                         | 8.5                                           | 30_39                   | 0.829 |
| LINC00467     | long intergenic non-protein coding RNA 467                      | Testis                         | 9.5                                           | 30_14                   | 0.827 |
| CRISP2        | cysteine rich secretory protein 2                               | Testis                         | 10.0                                          | 29_168                  | 0.825 |
| AC004381.6    |                                                                 | Testis                         | 8.8                                           | 29_168                  | 0.823 |
| ACTL10        | actin like 10                                                   | Testis                         | 7.2                                           | 29_73                   | 0.817 |
| FAM71E1       | family with sequence similarity 71 member E1                    | Testis                         | 8.3                                           | 30_39                   | 0.811 |
| CCDC11        | cilia and flagella associated protein 53                        | Testis                         | 7.4                                           | 30_39                   | 0.810 |
| GS1-259H13.2  |                                                                 | Testis                         | 7.7                                           | 30_258                  | 0.809 |
| RP11-496H1.2  |                                                                 | Testis                         | 7.4                                           | 29_39                   | 0.808 |
| INSL3         | insulin like 3                                                  | Testis                         | 8.9                                           | 29_39                   | 0.802 |
| ADAD2         | adenosine deaminase domain containing 2                         | Testis                         | 7.5                                           | 29_285                  | 0.799 |
| ACRBP         | acrosin binding protein                                         | Testis                         | 9.3                                           | 30_246                  | 0.798 |
| ABHD1         | abhydrolase domain containing 1                                 | Testis                         | 7.1                                           | 29_39                   | 0.789 |
| COX6B2        | cytochrome c oxidase subunit 6B2                                | Testis                         | 7.3                                           | 29_258                  | 0.786 |

| Gene          | Gene name                                              | Tissue with highest expression | Highest median tissue expression ( $\log_2$ ) | Best correlated feature | r     |
|---------------|--------------------------------------------------------|--------------------------------|-----------------------------------------------|-------------------------|-------|
| SPACA4        | sperm acrosome associated 4                            | Testis                         | 7.9                                           | 30_246                  | 0.785 |
| PHOSPHO1      | phosphoethanolamine/phosphocholine phosphatase 1       | Testis                         | 7.3                                           | 29_246                  | 0.782 |
| C1orf194      | chromosome 1 open reading frame 194                    | Testis                         | 8.3                                           | 30_39                   | 0.778 |
| SPATA24       | spermatogenesis associated 24                          | Testis                         | 7.5                                           | 29_73                   | 0.778 |
| CCT6B         | chaperonin containing TCP1 subunit 6B                  | Testis                         | 7.6                                           | 29_258                  | 0.777 |
| SOCS7         | suppressor of cytokine signaling 7                     | Testis                         | 7.6                                           | 29_379                  | 0.776 |
| ERICH2        | glutamate rich 2                                       | Testis                         | 8.5                                           | 29_39                   | 0.773 |
| SPINK2        | serine peptidase inhibitor Kazal type 2                | Testis                         | 9.2                                           | 29_73                   | 0.773 |
| SYCE1         | synaptonemal complex central element protein 1         | Testis                         | 7.6                                           | 30_115                  | 0.773 |
| PCSK4         | proprotein convertase subtilisin/kexin type 4          | Testis                         | 8.2                                           | 30_39                   | 0.773 |
| PRSS21        | serine protease 21                                     | Testis                         | 7.0                                           | 30_168                  | 0.773 |
| TUBA3E        | tubulin alpha 3e                                       | Testis                         | 8.5                                           | 30_55                   | 0.765 |
| ACR           | acrosin                                                | Testis                         | 7.2                                           | 29_246                  | 0.761 |
| MIR202        | microRNA 202                                           | Testis                         | 9.6                                           | 29_240                  | 0.757 |
| PROCA1        | protein interacting with cyclin A1                     | Testis                         | 8.0                                           | 29_39                   | 0.756 |
| ZDHHC19       | zinc finger DHHC-type palmitoyltransferase 19          | Testis                         | 7.1                                           | 29_246                  | 0.755 |
| LRWD1         | leucine rich repeats and WD repeat domain containing 1 | Testis                         | 9.4                                           | 30_246                  | 0.754 |
| TUBA3D        | tubulin alpha 3d                                       | Testis                         | 8.7                                           | 30_73                   | 0.752 |
| CTD-2182N23.1 |                                                        | Thyroid                        | 9.1                                           | 29_93                   | 0.937 |
| TSHR          | thyroid stimulating hormone receptor                   | Thyroid                        | 7.3                                           | 30_93                   | 0.907 |
| SLC26A7       | solute carrier family 26 member 7                      | Thyroid                        | 8.8                                           | 30_499                  | 0.888 |
| NKX2-1        | NK2 homeobox 1                                         | Thyroid                        | 8.5                                           | 29_202                  | 0.870 |
| TG            | thyroglobulin                                          | Thyroid                        | 12.3                                          | 30_93                   | 0.869 |
| SFTA3         | surfactant associated 3                                | Thyroid                        | 7.4                                           | 27_346                  | 0.842 |
| IYD           | iodotyrosine deiodinase                                | Thyroid                        | 8.5                                           | 29_93                   | 0.836 |
| SLC26A4-AS1   | SLC26A4 antisense RNA 1                                | Thyroid                        | 7.1                                           | 30_217                  | 0.806 |
| PAX8          | paired box 8                                           | Thyroid                        | 10.4                                          | 29_499                  | 0.802 |
| FOXE1         | forkhead box E1                                        | Thyroid                        | 7.5                                           | 27_376                  | 0.778 |
| PCED1A        | PC-esterase domain containing 1A                       | Thyroid                        | 7.5                                           | 26_506                  | 0.751 |
| TRIP6         | thyroid hormone receptor interactor 6                  | Uterus                         | 7.6                                           | 12_209                  | 0.762 |
