# Supplementary material for: Identifying transcriptomic correlates of histology using deep learning
Source: PubMed Central journal article supplement (PMC7688140; doi:10.1371/journal.pone.0242858), 2020-11-25
Supplement: pone.0242858.s006.pdf [file pone.0242858.s006.pdf]

**S3 Table. Developmental and transcription regulation genes correlated with visual features.** Genes with Gene Ontology ‘*developmental process*’ or ‘*transcription regulator activity*’ annotations are grouped w.r.t. tissues and ordered by correlation - for each gene we only show the best correlated feature, in the form [layer]\_[channel] (for the architecture VGG16 and the test dataset; correlation threshold=0.75,  $\log_2$  gene expression threshold=7). Genes with ‘*transcription regulator activity*’ are shown in red.

| Gene     | Gene name                                                          | GO                                                                           | Tissue with highest expression | Highest median tissue expression ( $\log_2$ ) | Best correlated feature | r     |
|----------|--------------------------------------------------------------------|------------------------------------------------------------------------------|--------------------------------|-----------------------------------------------|-------------------------|-------|
| FABP4    | Fatty acid-binding protein, adipocyte                              | white fat cell differentiation; brown fat cell differentiation               | Adipose - Visceral (Omentum)   | 12.6                                          | 1_14                    | 0.767 |
| CYP17A1  | Steroid 17-alpha-hydroxylase/17,20 lyase                           | sex differentiation                                                          | Adrenal Gland                  | 12.4                                          | 20_467                  | 0.805 |
| HSD3B2   | 3 beta-hydroxysteroid dehydrogenase/Delta 5-->4-isomerase type 2   | hippocampus development                                                      | Adrenal Gland                  | 11.2                                          | 29_123                  | 0.791 |
| STAR     | Steroidogenic acute regulatory protein, mitochondrial              | brain development                                                            | Adrenal Gland                  | 12.5                                          | 29_132                  | 0.770 |
| TPM4     | Tropomyosin alpha-4 chain                                          | osteoblast differentiation                                                   | Artery - Aorta                 | 9.1                                           | 19_468                  | 0.767 |
| S100A6   | Protein S100-A6                                                    | axonogenesis                                                                 | Artery - Aorta                 | 11.6                                          | 19_162                  | 0.760 |
| YAP1     | Transcriptional coactivator YAP1                                   | vasculogenesis                                                               | Artery - Aorta                 | 7.6                                           | 19_162                  | 0.758 |
| MARVELD1 | MARVEL domain-containing protein 1                                 | myelination                                                                  | Artery - Tibial                | 7.8                                           | 19_162                  | 0.764 |
| GNG12    | Guanine nucleotide-binding protein G(I)/G(S)/G(O) subunit gamma-12 | cerebral cortex development                                                  | Artery - Tibial                | 7.1                                           | 12_209                  | 0.755 |
| ZIC4     | Zinc finger protein ZIC 4                                          | central nervous system development                                           | Brain - Cerebellum             | 7.0                                           | 29_447                  | 0.922 |
| NEUROD2  | Neurogenic differentiation factor 2                                | cerebellar cortex development; positive regulation of neuron differentiation | Brain - Cerebellum             | 7.2                                           | 29_463                  | 0.915 |
| NEUROD1  | Neurogenic differentiation factor 1                                | cerebellum development; neurogenesis                                         | Brain - Cerebellum             | 7.8                                           | 29_479                  | 0.873 |
| CRTAM    | Cytotoxic and regulatory T-cell molecule                           | regulation of T cell differentiation                                         | Brain - Cerebellum             | 7.2                                           | 29_479                  | 0.868 |
| ZIC2     | Zinc finger protein ZIC 2                                          | brain development; cell differentiation                                      | Brain - Cerebellum             | 7.9                                           | 29_463                  | 0.854 |
| SLC12A5  | Solute carrier family 12 member 5                                  | dendritic spine development; multicellular organism growth                   | Brain - Cerebellum             | 7.5                                           | 27_140                  | 0.850 |
| ZIC1     | Zinc finger protein ZIC 1                                          | brain development                                                            | Brain - Cerebellum             | 8.1                                           | 29_479                  | 0.844 |
| ELAVL3   | ELAV-like protein 3                                                | nervous system development; cell differentiation                             | Brain - Cerebellum             | 8.0                                           | 29_463                  | 0.834 |
| PVALB    | Parvalbumin alpha                                                  | cochlea development                                                          | Brain - Cerebellum             | 9.1                                           | 29_463                  | 0.781 |
| HPCAL4   | Hippocalcin-like protein 4                                         | central nervous system development                                           | Brain - Cerebellum             | 7.5                                           | 29_463                  | 0.781 |
| CPLX2    | Complexin-2                                                        | nervous system development; cell differentiation                             | Brain - Cerebellum             | 8.7                                           | 27_140                  | 0.762 |
| SPOCK2   | Testican-2                                                         | synapse assembly; regulation of cell differentiation                         | Brain - Cerebellum             | 8.6                                           | 27_148                  | 0.761 |
| SLC1A2   | Excitatory amino acid transporter 2                                | telencephalon development; multicellular organism growth                     | Brain - Cortex                 | 8.7                                           | 18_8                    | 0.844 |
| GRIN1    | Glutamate receptor ionotropic, NMDA 1                              | cerebral cortex development                                                  | Brain - Cortex                 | 7.9                                           | 18_8                    | 0.812 |
| HPCA     | Neuron-specific calcium-binding protein hippocalcin                | brain development                                                            | Brain - Cortex                 | 7.5                                           | 29_485                  | 0.811 |
| PACSIN1  | Protein kinase C and casein kinase substrate in neurons protein 1  | neuron projection morphogenesis; positive regulation of dendrite development | Brain - Cortex                 | 8.5                                           | 29_463                  | 0.810 |
| SLC17A7  | Vesicular glutamate transporter 1                                  | brain development; synaptic vesicle lumen acidification                      | Brain - Cortex                 | 9.3                                           | 18_8                    | 0.799 |
| CAMK2A   | Calcium/calmodulin-dependent protein kinase type II subunit alpha  | dendritic spine development; regulation of neuron migration                  | Brain - Cortex                 | 9.2                                           | 23_417                  | 0.786 |
| DDN      | Dendrin                                                            | DNA-binding transcription factor activity, RNA polymerase II-specific        | Brain - Cortex                 | 7.9                                           | 25_478                  | 0.775 |
| CEND1    | Cell cycle exit and neuronal differentiation protein 1             | neuron differentiation                                                       | Brain - Cortex                 | 8.6                                           | 29_485                  | 0.755 |
| KIF5A    | Kinesin heavy chain isoform 5A                                     | axon guidance                                                                | Brain - Cortex                 | 10.0                                          | 29_485                  | 0.754 |
| NBL1     | Neuroblastoma suppressor of tumorigenicity 1                       | animal organ morphogenesis                                                   | Cervix - Ectocervix            | 9.6                                           | 19_162                  | 0.758 |
| CRTAP    | Cartilage-associated protein                                       | spermatogenesis                                                              | Cervix - Ectocervix            | 8.1                                           | 12_223                  | 0.756 |
| HMGB1    | High mobility group protein B1                                     | developmental process                                                        | Cervix - Ectocervix            | 7.4                                           | 19_468                  | 0.753 |
| PIAS3    | E3 SUMO-protein ligase PIAS3                                       | transcription coregulator activity                                           | Cervix - Endocervix            | 7.0                                           | 19_468                  | 0.764 |

| Gene     | Gene name                                                      | GO                                                                                            | Tissue with highest expression | Highest median tissue expression ( $\log_2$ ) | Best correlated feature | r     |
|----------|----------------------------------------------------------------|-----------------------------------------------------------------------------------------------|--------------------------------|-----------------------------------------------|-------------------------|-------|
| SPIN1    | Spindlin-1                                                     | multicellular organism development                                                            | Cervix - Endocervix            | 7.2                                           | 19_333                  | 0.752 |
| PLXNB2   | Plexin-B2                                                      | brain development                                                                             | Cervix - Endocervix            | 8.0                                           | 12_164                  | 0.750 |
| NKX2-5   | Homeobox protein Nkx-2.5                                       | atrial cardiac muscle cell development                                                        | Heart - Atrial Appendage       | 7.0                                           | 30_214                  | 0.903 |
| BMP10    | Bone morphogenetic protein 10                                  | atrial cardiac muscle tissue morphogenesis                                                    | Heart - Atrial Appendage       | 8.3                                           | 29_313                  | 0.855 |
| NPPA     | Natriuretic peptides A                                         | cell growth involved in cardiac muscle cell development                                       | Heart - Atrial Appendage       | 14.9                                          | 29_481                  | 0.777 |
| NMRK2    | Nicotinamide riboside kinase 2                                 | negative regulation of myoblast differentiation                                               | Heart - Atrial Appendage       | 9.8                                           | 30_72                   | 0.751 |
| MYBPC3   | Myosin-binding protein C, cardiac-type                         | heart morphogenesis; ventricular cardiac muscle tissue morphogenesis                          | Heart - Left Ventricle         | 10.8                                          | 23_270                  | 0.783 |
| TNNI3    | Troponin I, cardiac muscle                                     | heart development; ventricular cardiac muscle tissue morphogenesis                            | Heart - Left Ventricle         | 12.0                                          | 25_28                   | 0.780 |
| TNNT2    | Troponin T, cardiac muscle                                     | ventricular cardiac muscle tissue morphogenesis; sarcomere organization                       | Heart - Left Ventricle         | 11.6                                          | 25_31                   | 0.759 |
| CSRP3    | Cysteine and glycine-rich protein 3                            | cardiac muscle tissue development; cardiac myofibril assembly                                 | Heart - Left Ventricle         | 9.4                                           | 30_72                   | 0.755 |
| AQP2     | Aquaporin-2                                                    | metanephric collecting duct development                                                       | Kidney - Cortex                | 7.6                                           | 29_280                  | 0.890 |
| UMOD     | Uromodulin                                                     | metanephric ascending thin limb development; metanephric distal convoluted tubule development | Kidney - Cortex                | 7.4                                           | 27_274                  | 0.874 |
| PLG      | Plasminogen                                                    | tissue regeneration                                                                           | Liver                          | 8.7                                           | 29_234                  | 0.959 |
| APOA5    | Apolipoprotein A-V                                             | tissue regeneration                                                                           | Liver                          | 8.8                                           | 29_192                  | 0.954 |
| SERPINC1 | Antithrombin-III                                               | lactation                                                                                     | Liver                          | 10.1                                          | 29_192                  | 0.952 |
| HRG      | Histidine-rich glycoprotein                                    | positive regulation of blood vessel remodeling                                                | Liver                          | 9.2                                           | 29_234                  | 0.952 |
| F2       | Prothrombin                                                    | multicellular organism development; regulation of cell shape                                  | Liver                          | 9.4                                           | 29_192                  | 0.949 |
| AHSG     | Alpha-2-HS-glycoprotein                                        | skeletal system development                                                                   | Liver                          | 10.7                                          | 29_192                  | 0.946 |
| APCS     | Serum amyloid P-component                                      | negative regulation of monocyte differentiation                                               | Liver                          | 10.7                                          | 29_192                  | 0.942 |
| BAAT     | Bile acid-CoA:amino acid N-acyltransferase                     | liver development; animal organ regeneration                                                  | Liver                          | 7.7                                           | 29_192                  | 0.938 |
| ANGPTL3  | Angiopoietin-related protein 3                                 | artery morphogenesis                                                                          | Liver                          | 7.3                                           | 29_234                  | 0.934 |
| APOA2    | Apolipoprotein A-II                                            | animal organ regeneration                                                                     | Liver                          | 12.2                                          | 29_192                  | 0.931 |
| CYP4A11  | Cytochrome P450 4A11                                           | kidney development                                                                            | Liver                          | 8.3                                           | 29_234                  | 0.924 |
| CPB2     | Carboxypeptidase B2                                            | liver regeneration; negative regulation of hepatocyte proliferation                           | Liver                          | 8.5                                           | 29_192                  | 0.922 |
| PROC     | Vitamin K-dependent protein C                                  | positive regulation of establishment of endothelial barrier                                   | Liver                          | 7.9                                           | 29_234                  | 0.919 |
| APOH     | Beta-2-glycoprotein 1                                          | negative regulation of angiogenesis                                                           | Liver                          | 11.7                                          | 29_234                  | 0.919 |
| FGB      | Fibrinogen beta chain                                          | positive regulation of substrate adhesion-dependent cell spreading                            | Liver                          | 12.6                                          | 29_192                  | 0.896 |
| FGL1     | Fibrinogen-like protein 1                                      | hepatocyte proliferation                                                                      | Liver                          | 10.2                                          | 18_231                  | 0.879 |
| G6PC     | Glucose-6-phosphatase                                          | multicellular organism growth                                                                 | Liver                          | 7.1                                           | 29_234                  | 0.872 |
| FGA      | Fibrinogen alpha chain                                         | positive regulation of substrate adhesion-dependent cell spreading                            | Liver                          | 12.2                                          | 30_192                  | 0.858 |
| ASGR2    | Asialoglycoprotein receptor 2                                  | bone mineralization                                                                           | Liver                          | 8.8                                           | 30_192                  | 0.854 |
| CRP      | C-reactive protein                                             | negative regulation of macrophage derived foam cell differentiation                           | Liver                          | 12.6                                          | 29_192                  | 0.852 |
| VTN      | Vitronectin                                                    | liver regeneration; endodermal cell differentiation                                           | Liver                          | 11.2                                          | 18_279                  | 0.851 |
| FGG      | Fibrinogen gamma chain                                         | positive regulation of substrate adhesion-dependent cell spreading                            | Liver                          | 12.2                                          | 30_192                  | 0.829 |
| IGFBP1   | Insulin-like growth factor-binding protein 1                   | tissue regeneration                                                                           | Liver                          | 7.2                                           | 29_75                   | 0.802 |
| APOB     | Apolipoprotein B-100                                           | post-embryonic development                                                                    | Liver                          | 8.5                                           | 30_438                  | 0.784 |
| CREB3L3  | Cyclic AMP-responsive element-binding protein 3-like protein 3 | DNA-binding transcription factor activity, RNA polymerase II-specific                         | Liver                          | 8.2                                           | 20_481                  | 0.777 |
| CPS1     | Carbamoyl-phosphate synthase [ammonia], mitochondrial          | hepatocyte differentiation; midgut development                                                | Liver                          | 8.6                                           | 29_192                  | 0.775 |
| ARG1     | Arginase-1                                                     | liver development                                                                             | Liver                          | 9.0                                           | 20_194                  | 0.768 |

| Gene    | Gene name                                                           | GO                                                                                                             | Tissue with highest expression | Highest median tissue expression ( $\log_2$ ) | Best correlated feature | r     |
|---------|---------------------------------------------------------------------|----------------------------------------------------------------------------------------------------------------|--------------------------------|-----------------------------------------------|-------------------------|-------|
| SFTPB   | Pulmonary surfactant-associated protein B                           | animal organ morphogenesis                                                                                     | Lung                           | 12.2                                          | 29_383                  | 0.789 |
| SCGB1A1 | Uteroglobin                                                         | embryo implantation                                                                                            | Lung                           | 9.2                                           | 29_155                  | 0.776 |
| STATH   | Statherin                                                           | hepatocyte differentiation; midgut development                                                                 | Minor Salivary Gland           | 7.7                                           | 25_200                  | 0.767 |
| MYF6    | Myogenic factor 6                                                   | skeletal muscle tissue development; muscle cell fate commitment                                                | Muscle - Skeletal              | 7.2                                           | 25_409                  | 0.872 |
| NEB     | Nebulin                                                             | somatic muscle development; muscle fiber development                                                           | Muscle - Skeletal              | 9.9                                           | 25_409                  | 0.851 |
| XIRP2   | Xin actin-binding repeat-containing protein 2                       | cardiac muscle tissue morphogenesis                                                                            | Muscle - Skeletal              | 8.0                                           | 18_102                  | 0.828 |
| RYR1    | Ryanodine receptor 1                                                | skeletal muscle fiber development                                                                              | Muscle - Skeletal              | 8.6                                           | 29_362                  | 0.827 |
| TMOD4   | Tropomodulin-4                                                      | myofibril assembly                                                                                             | Muscle - Skeletal              | 8.6                                           | 30_16                   | 0.827 |
| KLHL40  | Kelch-like protein 40                                               | skeletal muscle fiber development; skeletal muscle fiber differentiation                                       | Muscle - Skeletal              | 7.8                                           | 25_409                  | 0.824 |
| SMTNL1  | Smoothelin-like protein 1                                           | muscle organ morphogenesis                                                                                     | Muscle - Skeletal              | 7.2                                           | 30_362                  | 0.820 |
| TTN     | Titin                                                               | skeletal muscle thin filament assembly; skeletal muscle myosin thick filament assembly; sarcomere organization | Muscle - Skeletal              | 8.7                                           | 18_136                  | 0.810 |
| MYPN    | Myopalladin                                                         | sarcomere organization                                                                                         | Muscle - Skeletal              | 7.3                                           | 30_72                   | 0.805 |
| LMOD3   | Leiomodin-3                                                         | skeletal muscle fiber development; myofibril assembly                                                          | Muscle - Skeletal              | 7.4                                           | 18_136                  | 0.802 |
| MYLPF   | Myosin regulatory light chain 2, skeletal muscle isoform            | skeletal muscle tissue development                                                                             | Muscle - Skeletal              | 10.9                                          | 30_161                  | 0.798 |
| LMOD2   | Leiomodin-2                                                         | sarcomere organization; myofibril assembly                                                                     | Muscle - Skeletal              | 8.9                                           | 30_72                   | 0.798 |
| NRAP    | Nebulin-related-anchoring protein                                   | muscle fiber development                                                                                       | Muscle - Skeletal              | 10.0                                          | 18_136                  | 0.794 |
| MYL2    | Myosin regulatory light chain 2, ventricular/cardiac muscle isoform | muscle cell fate specification; muscle fiber development                                                       | Muscle - Skeletal              | 13.7                                          | 18_136                  | 0.781 |
| MYLK2   | Myosin light chain kinase 2, skeletal/cardiac muscle                | skeletal muscle satellite cell differentiation; skeletal muscle cell differentiation                           | Muscle - Skeletal              | 7.7                                           | 30_161                  | 0.777 |
| TNNT1   | Troponin T, slow skeletal muscle                                    | sarcomere organization                                                                                         | Muscle - Skeletal              | 12.5                                          | 18_272                  | 0.776 |
| TNNI1   | Troponin I, slow skeletal muscle                                    | ventricular cardiac muscle tissue morphogenesis                                                                | Muscle - Skeletal              | 10.0                                          | 30_161                  | 0.773 |
| MB      | Myoglobin                                                           | heart development                                                                                              | Muscle - Skeletal              | 13.1                                          | 30_72                   | 0.772 |
| MYH7    | Myosin-7                                                            | adult heart development; ventricular cardiac muscle tissue morphogenesis                                       | Muscle - Skeletal              | 12.4                                          | 18_136                  | 0.770 |
| KLHL41  | Kelch-like protein 41                                               | skeletal muscle fiber development; myofibril assembly                                                          | Muscle - Skeletal              | 11.6                                          | 20_171                  | 0.766 |
| ANP32B  | Acidic leucine-rich nuclear phosphoprotein 32 family member B       | negative regulation of cell differentiation                                                                    | Nerve - Tibial                 | 8.2                                           | 19_468                  | 0.775 |
| CNTF    | Ciliary neurotrophic factor                                         | neuron development; positive regulation of axon regeneration                                                   | Nerve - Tibial                 | 8.3                                           | 29_36                   | 0.769 |
| MXRA8   | Matrix remodeling-associated protein 8                              | establishment of glial blood-brain barrier                                                                     | Nerve - Tibial                 | 8.5                                           | 19_468                  | 0.751 |
| RBPJL   | Recombining binding protein suppressor of hairless-like protein     | DNA-binding transcription factor activity, RNA polymerase II-specific                                          | Pancreas                       | 9.5                                           | 30_467                  | 0.935 |
| INS     | Insulin                                                             | positive regulation of cell differentiation                                                                    | Pancreas                       | 10.8                                          | 18_158                  | 0.913 |
| CELA2A  | Chymotrypsin-like elastase family member 2A                         | cornification                                                                                                  | Pancreas                       | 12.6                                          | 23_110                  | 0.895 |
| CEL     | Bile salt-activated lipase                                          | presynaptic membrane assembly                                                                                  | Pancreas                       | 14.0                                          | 23_324                  | 0.866 |
| REG3G   | Regenerating islet-derived protein 3-gamma                          | negative regulation of keratinocyte differentiation                                                            | Pancreas                       | 9.6                                           | 30_290                  | 0.815 |
| FSHB    | Follicle-stimulating hormone subunit beta                           | follicle-stimulating hormone signaling pathway                                                                 | Pituitary                      | 7.1                                           | 29_279                  | 0.930 |
| POU1F1  | Pituitary-specific positive transcription factor 1                  | somatotropin secreting cell development                                                                        | Pituitary                      | 7.3                                           | 29_279                  | 0.913 |
| GHRHR   | Growth hormone-releasing hormone receptor                           | somatotropin secreting cell development                                                                        | Pituitary                      | 8.9                                           | 29_279                  | 0.900 |
| TSHB    | Thyrotropin subunit beta                                            | anatomical structure morphogenesis                                                                             | Pituitary                      | 9.2                                           | 29_436                  | 0.869 |
| LHB     | Lutropin subunit beta                                               | male gonad development                                                                                         | Pituitary                      | 12.0                                          | 30_429                  | 0.844 |
| MYO15A  | Unconventional myosin-XV                                            | inner ear morphogenesis                                                                                        | Pituitary                      | 7.2                                           | 29_436                  | 0.803 |
| PRL     | Prolactin                                                           | positive regulation of lactation                                                                               | Pituitary                      | 15.5                                          | 29_436                  | 0.799 |

| Gene          | Gene name                                                    | GO                                                                                                                                                           | Tissue with highest expression | Highest median tissue expression ( $\log_2$ ) | Best correlated feature | r     |
|---------------|--------------------------------------------------------------|--------------------------------------------------------------------------------------------------------------------------------------------------------------|--------------------------------|-----------------------------------------------|-------------------------|-------|
| TGFBR3L       | Transforming growth factor-beta receptor type 3-like protein | epithelial to mesenchymal transition                                                                                                                         | Pituitary                      | 8.0                                           | 29_436                  | 0.787 |
| GH1           | Somatotropin                                                 | positive regulation of multicellular organism growth                                                                                                         | Pituitary                      | 16.8                                          | 30_429                  | 0.763 |
| COL22A1       | Collagen alpha-1(XII) chain                                  | endothelial cell morphogenesis                                                                                                                               | Pituitary                      | 7.2                                           | 30_436                  | 0.753 |
| KLK3          | Prostate-specific antigen                                    | negative regulation of angiogenesis                                                                                                                          | Prostate                       | 12.8                                          | 29_458                  | 0.900 |
| KLK4          | Kallikrein-4                                                 | biomineral tissue development                                                                                                                                | Prostate                       | 9.4                                           | 29_430                  | 0.821 |
| <b>HOXB13</b> | Homeobox protein Hox-B13                                     | prostate epithelial cord arborization involved in prostate glandular acinus morphogenesis; epithelial cell maturation involved in prostate gland development | Prostate                       | 7.3                                           | 30_458                  | 0.801 |
| KRT77         | Keratin, type II cytoskeletal 1b                             | keratinization; cornification                                                                                                                                | Skin - Not Sun Exposed         | 8.6                                           | 18_78                   | 0.884 |
| FLG2          | Filaggrin-2                                                  | epidermis morphogenesis; establishment of skin barrier                                                                                                       | Skin - Sun Exposed             | 9.6                                           | 18_78                   | 0.883 |
| LCE2C         | Late cornified envelope protein 2C                           | keratinization                                                                                                                                               | Skin - Sun Exposed             | 8.2                                           | 18_78                   | 0.878 |
| LCE1A         | Late cornified envelope protein 1A                           | cornification                                                                                                                                                | Skin - Sun Exposed             | 8.9                                           | 18_78                   | 0.878 |
| CDSN          | Corneodesmosin                                               | epidermis development; keratinocyte differentiation                                                                                                          | Skin - Sun Exposed             | 8.3                                           | 18_78                   | 0.875 |
| LCE2B         | Late cornified envelope protein 2B                           | epidermis development; keratinization                                                                                                                        | Skin - Sun Exposed             | 9.4                                           | 18_78                   | 0.874 |
| LCE1B         | Late cornified envelope protein 1B                           | keratinization                                                                                                                                               | Skin - Sun Exposed             | 8.0                                           | 18_78                   | 0.874 |
| LCE1C         | Late cornified envelope protein 1C                           | keratinization                                                                                                                                               | Skin - Sun Exposed             | 9.4                                           | 18_78                   | 0.873 |
| LCE6A         | Late cornified envelope protein 6A                           | keratinization                                                                                                                                               | Skin - Sun Exposed             | 7.6                                           | 18_78                   | 0.870 |
| LCE1F         | Late cornified envelope protein 1F                           | keratinization                                                                                                                                               | Skin - Sun Exposed             | 7.6                                           | 18_78                   | 0.868 |
| LCE5A         | Late cornified envelope protein 5A                           | keratinization                                                                                                                                               | Skin - Sun Exposed             | 7.3                                           | 18_78                   | 0.864 |
| LCE2D         | Late cornified envelope protein 2D                           | keratinization                                                                                                                                               | Skin - Sun Exposed             | 7.5                                           | 18_78                   | 0.863 |
| LCE2A         | Late cornified envelope protein 2A                           | keratinization                                                                                                                                               | Skin - Sun Exposed             | 7.2                                           | 18_78                   | 0.856 |
| DSC1          | Desmocollin-1                                                | keratinization; cornification                                                                                                                                | Skin - Sun Exposed             | 8.2                                           | 18_78                   | 0.849 |
| KRT2          | Keratin, type II cytoskeletal 2 epidermal                    | keratinocyte development; epidermis development                                                                                                              | Skin - Sun Exposed             | 12.8                                          | 18_78                   | 0.840 |
| FLG           | Filaggrin                                                    | keratinocyte differentiation; establishment of skin barrier                                                                                                  | Skin - Sun Exposed             | 9.0                                           | 18_78                   | 0.835 |
| SERPINB7      | Serpin B7                                                    | positive regulation of glomerular mesangial cell proliferation                                                                                               | Skin - Sun Exposed             | 7.4                                           | 18_78                   | 0.830 |
| KRT10         | Keratin, type I cytoskeletal 10                              | keratinocyte differentiation; positive regulation of epidermis development                                                                                   | Skin - Sun Exposed             | 14.6                                          | 18_78                   | 0.826 |
| CASP14        | Caspase-14                                                   | epidermis development; keratinization                                                                                                                        | Skin - Sun Exposed             | 9.4                                           | 18_78                   | 0.820 |
| PSAPL1        | Proactivator polypeptide-like 1                              | epithelial cell differentiation involved in prostate gland development                                                                                       | Skin - Sun Exposed             | 7.4                                           | 22_265                  | 0.812 |
| CST6          | Cystatin-M                                                   | epidermis development; anatomical structure morphogenesis                                                                                                    | Skin - Sun Exposed             | 9.6                                           | 20_329                  | 0.773 |
| ASPRV1        | Retroviral-like aspartic protease 1                          | skin development                                                                                                                                             | Skin - Sun Exposed             | 9.6                                           | 18_78                   | 0.772 |
| ALOX12B       | Arachidonate 12-lipoxygenase, 12R-type                       | establishment of skin barrier                                                                                                                                | Skin - Sun Exposed             | 7.4                                           | 25_227                  | 0.757 |
| <b>NR5A1</b>  | Steroidogenic factor 1                                       | DNA-binding transcription factor activity, RNA polymerase II-specific; adrenal gland development                                                             | Spleen; Adrenal Gland          | 8.0                                           | 27_423                  | 0.780 |
| CD19          | B-lymphocyte antigen CD19                                    | B-1 B cell differentiation                                                                                                                                   | Spleen                         | 7.9                                           | 27_389                  | 0.759 |
| KCNE2         | Potassium voltage-gated channel subfamily E member 2         | tongue development                                                                                                                                           | Stomach                        | 8.3                                           | 29_287                  | 0.782 |
| DDX4          | Probable ATP-dependent RNA helicase DDX4                     | spermatogenesis; cell differentiation                                                                                                                        | Testis                         | 7.5                                           | 29_39                   | 0.951 |
| <b>DMRTB1</b> | Doublesex- and mab-3-related transcription factor B1         | DNA-binding transcription factor activity, RNA polymerase II-specific                                                                                        | Testis                         | 7.1                                           | 29_39                   | 0.949 |
| SHCBP1L       | Testicular spindle-associated protein SHCBP1L                | spermatogenesis; cell differentiation                                                                                                                        | Testis                         | 7.7                                           | 29_39                   | 0.945 |
| CALR3         | Calreticulin-3                                               | spermatogenesis; cell differentiation                                                                                                                        | Testis                         | 7.1                                           | 29_246                  | 0.945 |
| ZBP2          | Zona pellucida-binding protein 2                             | acrosome assembly                                                                                                                                            | Testis                         | 7.2                                           | 29_39                   | 0.941 |
| SPEM1         | Spermatid maturation protein 1                               | sperm individualization; spermatogenesis                                                                                                                     | Testis                         | 7.5                                           | 29_246                  | 0.939 |
| ACSBG2        | Long-chain-fatty-acid-CoA ligase ACSBG2                      | spermatogenesis; cell differentiation                                                                                                                        | Testis                         | 8.0                                           | 29_39                   | 0.938 |
| SPATA19       | Spermatogenesis-associated protein 19, mitochondrial         | spermatogenesis; cell differentiation                                                                                                                        | Testis                         | 8.0                                           | 29_168                  | 0.937 |

| Gene     | Gene name                                                  | GO                                                                         | Tissue with highest expression | Highest median tissue expression ( $\log_2$ ) | Best correlated feature | r     |
|----------|------------------------------------------------------------|----------------------------------------------------------------------------|--------------------------------|-----------------------------------------------|-------------------------|-------|
| RNF151   | RING finger protein 151                                    | spermatogenesis; cell differentiation                                      | Testis                         | 8.5                                           | 29_39                   | 0.937 |
| FSCN3    | Fascin-3                                                   | spermatid development                                                      | Testis                         | 7.2                                           | 29_246                  | 0.933 |
| TCP11    | T-complex protein 11 homolog                               | spermatogenesis; cell differentiation                                      | Testis                         | 8.7                                           | 29_258                  | 0.930 |
| ODF1     | Outer dense fiber protein 1                                | spermatogenesis; cell differentiation                                      | Testis                         | 9.6                                           | 29_39                   | 0.929 |
| IQCF1    | IQ domain-containing protein F1                            | positive regulation of flagellated sperm motility involved in capacitation | Testis                         | 7.8                                           | 29_246                  | 0.926 |
| PRM3     | Protamine-3                                                | spermatogenesis; cell differentiation                                      | Testis                         | 7.0                                           | 29_246                  | 0.926 |
| TDRG1    | Testis development-related protein 1                       | multicellular organism development                                         | Testis                         | 7.0                                           | 29_39                   | 0.923 |
| SYCP3    | Synaptonemal complex protein 3                             | spermatogenesis; spermatid development                                     | Testis                         | 7.2                                           | 29_39                   | 0.917 |
| CABS1    | Calcium-binding and spermatid-specific protein 1           | spermatogenesis                                                            | Testis                         | 7.9                                           | 29_73                   | 0.915 |
| DKKL1    | Dickkopf-like protein 1                                    | anatomical structure morphogenesis                                         | Testis                         | 9.3                                           | 29_39                   | 0.914 |
| RPL10L   | 60S ribosomal protein L10-like                             | spermatogenesis                                                            | Testis                         | 7.5                                           | 29_246                  | 0.908 |
| SYCE3    | Synaptonemal complex central element protein 3             | spermatogenesis                                                            | Testis                         | 7.9                                           | 29_39                   | 0.906 |
| CAPZA3   | F-actin-capping protein subunit alpha-3                    | spermatid development                                                      | Testis                         | 8.7                                           | 29_258                  | 0.906 |
| GTSF1    | Gametocyte-specific factor 1                               | spermatogenesis; cell differentiation                                      | Testis                         | 7.0                                           | 29_246                  | 0.905 |
| CCDC42   | Coiled-coil domain-containing protein 42                   | spermatid development                                                      | Testis                         | 7.0                                           | 29_73                   | 0.903 |
| TXNDC2   | Thioredoxin domain-containing protein 2                    | spermatogenesis; cell differentiation                                      | Testis                         | 7.1                                           | 29_246                  | 0.898 |
| TPPP2    | Tubulin polymerization-promoting protein family member 2   | spermatogenesis; cell differentiation                                      | Testis                         | 8.2                                           | 29_73                   | 0.888 |
| AKAP3    | A-kinase anchor protein 3                                  | blastocyst hatching                                                        | Testis                         | 7.3                                           | 29_39                   | 0.880 |
| TNP1     | Spermatid nuclear transition protein 1                     | spermatid development; spermatogenesis                                     | Testis                         | 13.1                                          | 29_39                   | 0.874 |
| TSSK6    | Testis-specific serine/threonine-protein kinase 6          | multicellular organism development; sperm chromatin condensation           | Testis                         | 8.2                                           | 29_246                  | 0.869 |
| MAEL     | Protein maelstrom homolog                                  | spermatogenesis                                                            | Testis                         | 7.3                                           | 29_39                   | 0.864 |
| TCP10L   | T-complex protein 10A homolog 1                            | transcription corepressor activity                                         | Testis                         | 8.1                                           | 29_39                   | 0.864 |
| CCIN     | Calicin                                                    | spermatogenesis                                                            | Testis                         | 7.3                                           | 29_73                   | 0.862 |
| PRAME    | Melanoma antigen preferentially expressed in tumors        | cell differentiation                                                       | Testis                         | 7.3                                           | 30_39                   | 0.860 |
| PRM1     | Sperm protamine P1                                         | spermatogenesis; cell differentiation                                      | Testis                         | 14.3                                          | 29_73                   | 0.850 |
| PRM2     | Protamine-2                                                | spermatogenesis; spermatid development                                     | Testis                         | 14.3                                          | 29_73                   | 0.849 |
| GGN      | Gametogenetin                                              | spermatogenesis; cell differentiation                                      | Testis                         | 7.5                                           | 29_39                   | 0.845 |
| ROPN1L   | Ropporin-1-like protein                                    | sperm capacitation                                                         | Testis                         | 9.0                                           | 29_39                   | 0.844 |
| CABYR    | Calcium-binding tyrosine phosphorylation-regulated protein | sperm capacitation                                                         | Testis                         | 8.0                                           | 29_39                   | 0.840 |
| INSL3    | Insulin-like 3                                             | spermatogenesis                                                            | Testis                         | 8.9                                           | 29_39                   | 0.802 |
| ACRBP    | Acrosin-binding protein                                    | spermatid development; acrosome assembly                                   | Testis                         | 9.3                                           | 30_246                  | 0.798 |
| PHOSPHO1 | Phosphoethanolamine/phosphocholine phosphatase             | regulation of bone mineralization                                          | Testis                         | 7.3                                           | 29_246                  | 0.782 |
| SPATA24  | Spermatogenesis-associated protein 24                      | spermatogenesis; cell differentiation                                      | Testis                         | 7.5                                           | 29_73                   | 0.778 |
| SPINK2   | Serine protease inhibitor Kazal-type 2                     | spermatid development; acrosome assembly                                   | Testis                         | 9.2                                           | 29_73                   | 0.773 |
| PCSK4    | Proprotein convertase subtilisin/kexin type 4              | sperm capacitation                                                         | Testis                         | 8.2                                           | 30_39                   | 0.773 |
| PRSS21   | Testisin                                                   | spermatogenesis                                                            | Testis                         | 7.0                                           | 30_168                  | 0.773 |
| NKX2-1   | Homeobox protein Nkx-2.1                                   | thyroid gland development                                                  | Thyroid                        | 8.5                                           | 29_202                  | 0.870 |
| TG       | Thyroglobulin                                              | thyroid gland development                                                  | Thyroid                        | 12.3                                          | 30_93                   | 0.869 |
| PAX8     | Paired box protein Pax-8                                   | thyroid gland development                                                  | Thyroid                        | 10.4                                          | 29_499                  | 0.802 |
| FOXE1    | Forkhead box protein E1                                    | thyroid gland development                                                  | Thyroid                        | 7.5                                           | 27_376                  | 0.778 |
| TRIP6    | Thyroid receptor-interacting protein 6                     | chordate embryonic development                                             | Uterus                         | 7.6                                           | 12_209                  | 0.762 |
