# Supplementary material for: Identifying transcriptomic correlates of histology using deep learning
Source: PLOS journal article supplement (doi:10.1371/journal.pone.0242858), 2020-11-25

**S1 Fig. Histograms of features, genes and their correlation.** (A) Histogram of feature values. (B) Histogram of  $\log_2$  transformed gene expression values  $\log_2(1+g)$ . (C) Histogram of gene-feature correlations (for genes with highest median tissue  $\log_2$  expression over 10). (D) Histogram of gene-feature correlations separately for non-negative features (e.g. outputs of ReLU units) and potentially negative features.

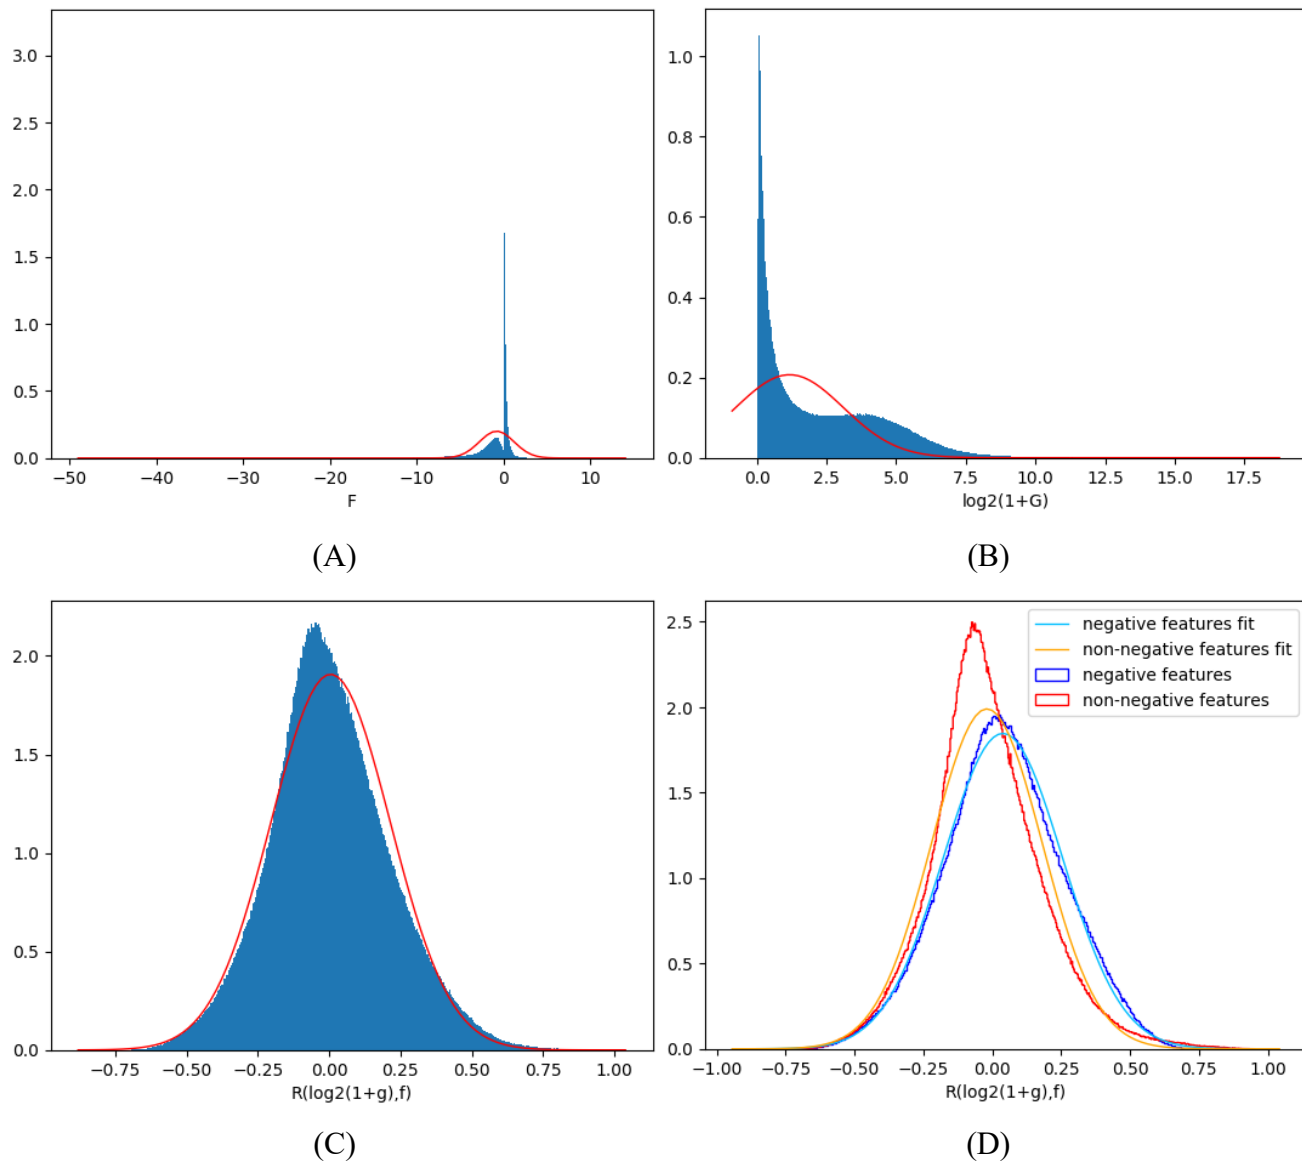

Supplement: S1 (10.1371/journal.pone.0242858.s001) [file journal.pone.0242858.s001]
